# Supplementary material for: Protein Kinase A: A Master Kinase of Granulosa Cell Differentiation
Source: PubMed Central journal article supplement (PMC4914995; doi:10.1038/srep28132), 2016-06-21
Supplement: srep28132-s1.pdf [file srep28132-s1.pdf]

## Protein Kinase A: A Master Kinase of Granulosa Cell Differentiation

Pawan Puri<sup>a</sup>, Lynda Little-Ihrig<sup>a</sup>, Uma Chandran<sup>b</sup>, Nathan C Law<sup>c</sup>, Mary Hunzicker-Dunn<sup>c</sup>, Anthony J. Zeleznik<sup>a\*</sup>

<sup>a</sup>Department of Obstetrics, Gynecology and Reproductive Sciences, Magee Womens Research Institute, University of Pittsburgh, Pittsburgh, PA, 15213 <sup>b</sup>Department of Biomedical Informatics, University of Pittsburgh, Pittsburgh, PA, 15206 <sup>c</sup>School of Molecular Biosciences, College of Veterinary Medicine, Washington State University, Pullman, WA, 99164

### **\*Corresponding author:**

Anthony J. Zeleznik, Ph.D.

Department of Obstetrics Gynecology and Reproductive Sciences

Magee Womens Research Institute

204 Craft Ave., Room B309

Pittsburgh, PA 15213

412-641-7673

zeleznikaj@mwri.magee.edu

Supplementary Figure 1. Uncropped blots used in the construction of composite of Figure 1 in text. Numbers in parentheses correspond to lane identification numbers in Figure 1.

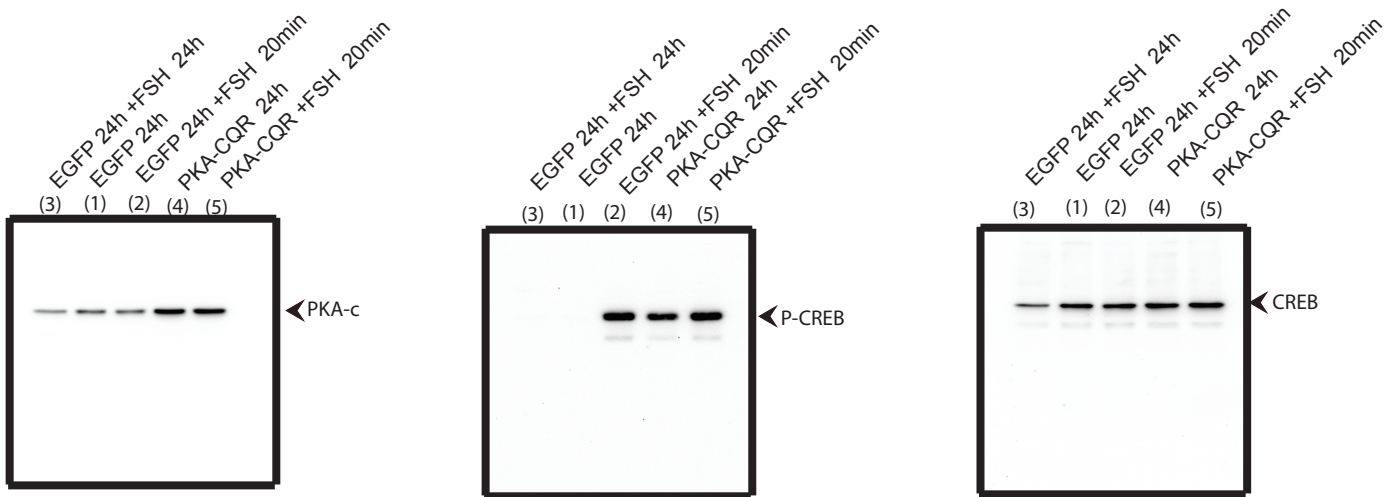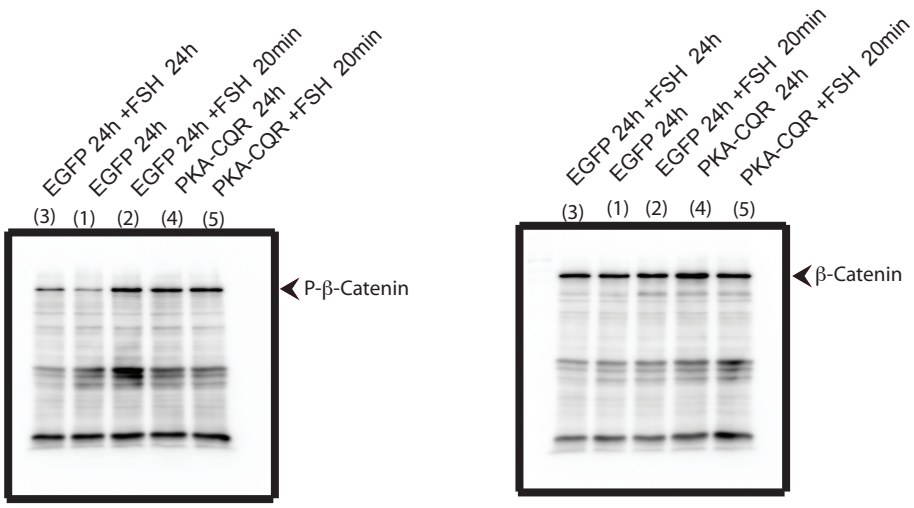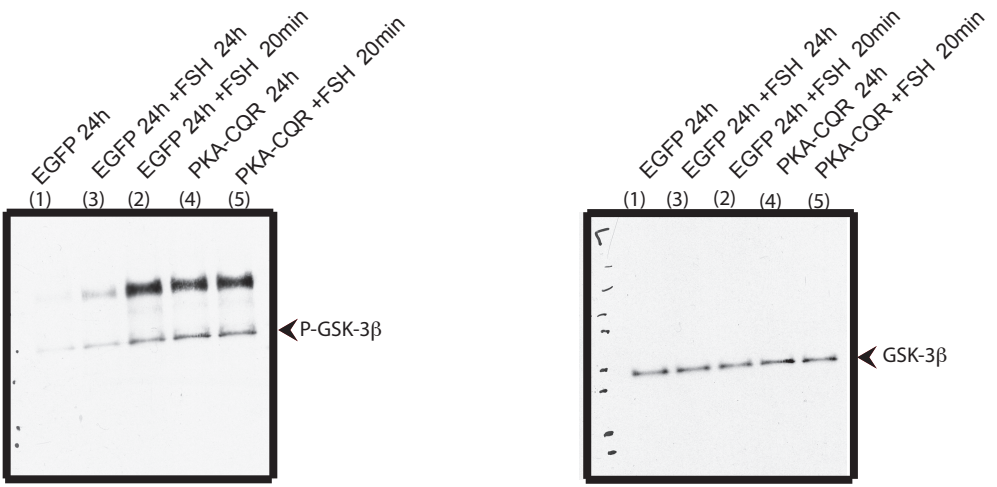

Supplementary Figure 2. Uncropped blots used in the construction of composite of Figure 2 in text. Numbers in parentheses correspond to lane identification numbers in Figure 2.

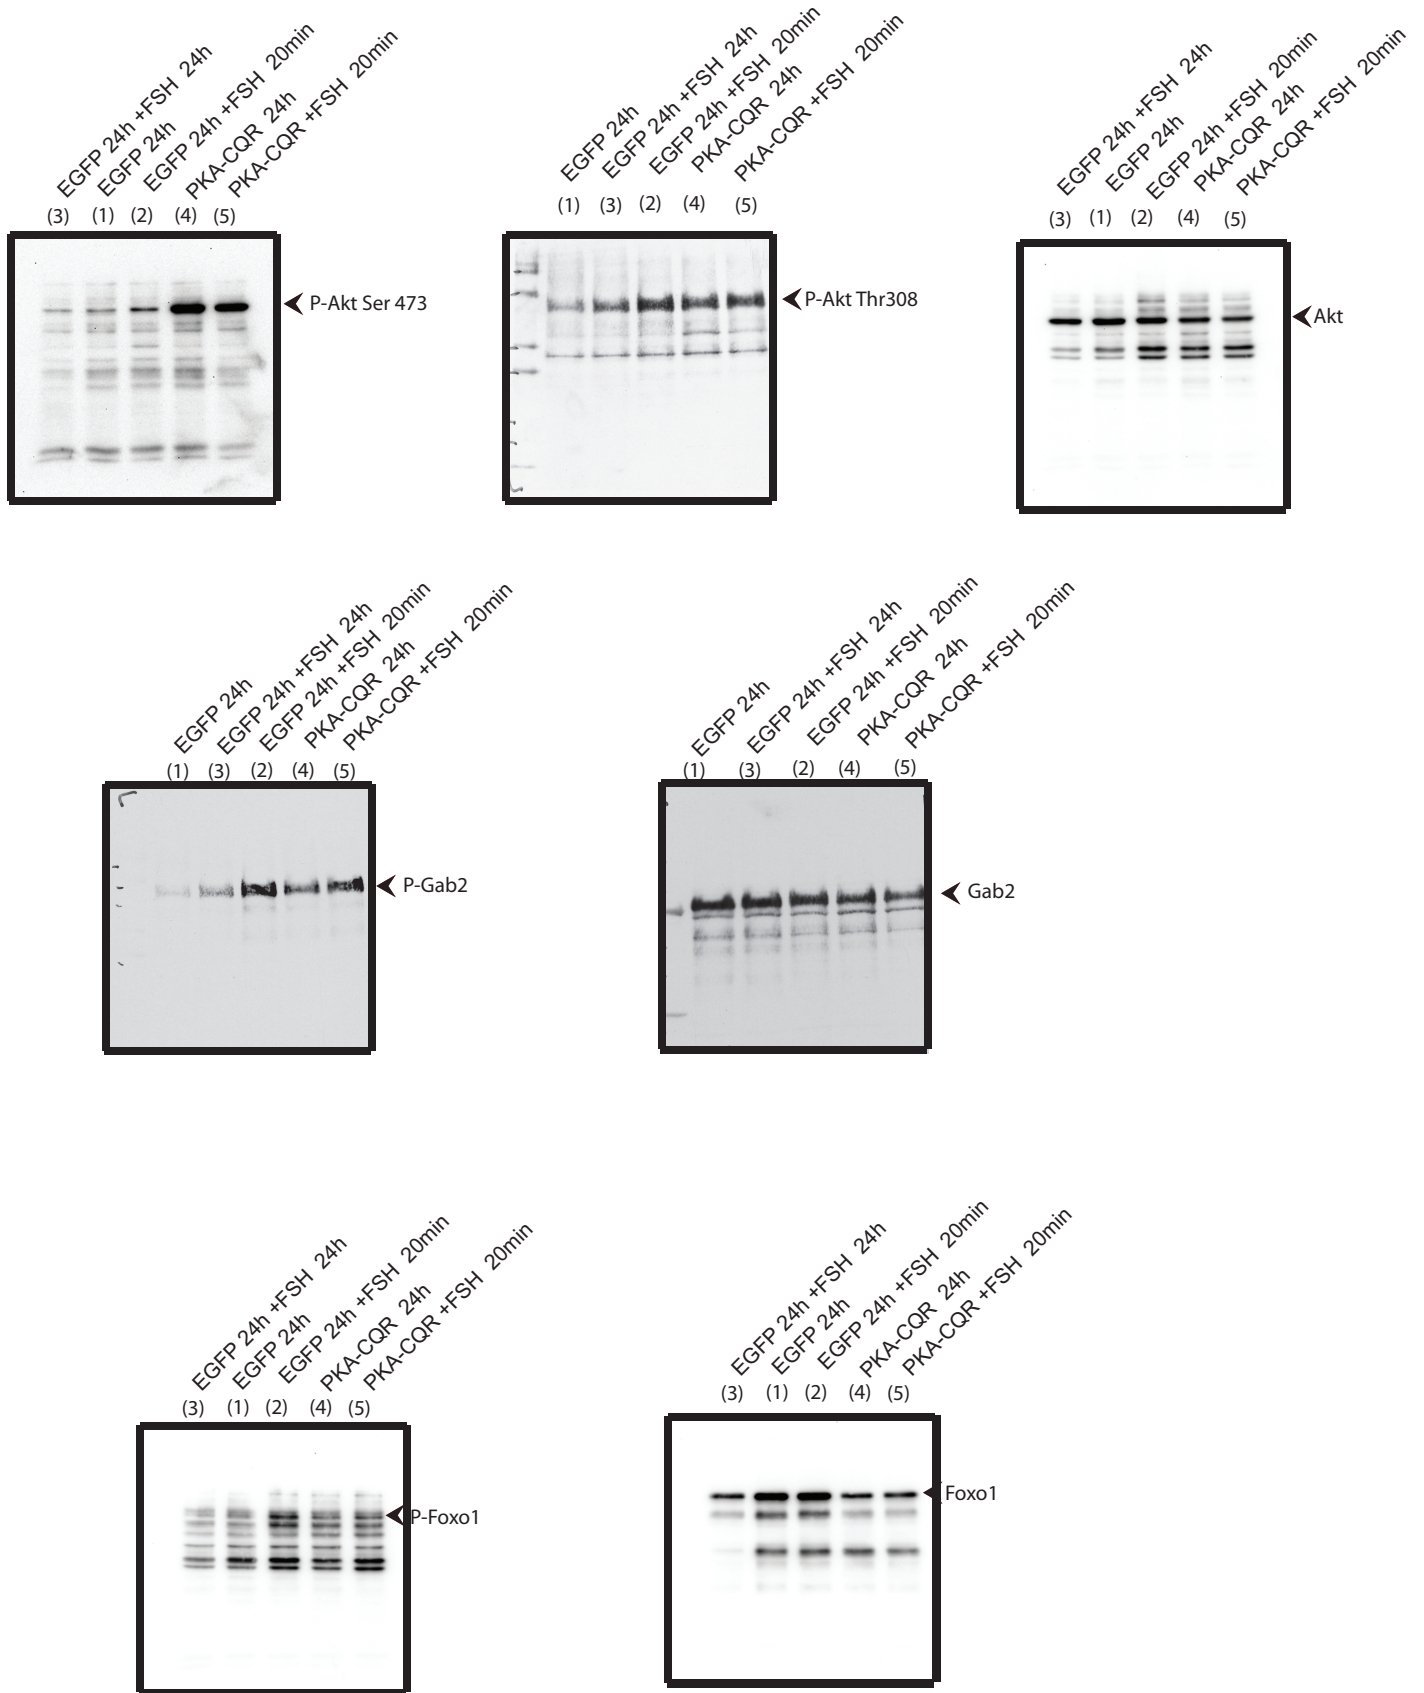

Supplementary Figure 3. Uncropped blots used in the construction of composite of Figure 3 in text. Numbers in parentheses correspond to lane identification numbers in Figure 3.

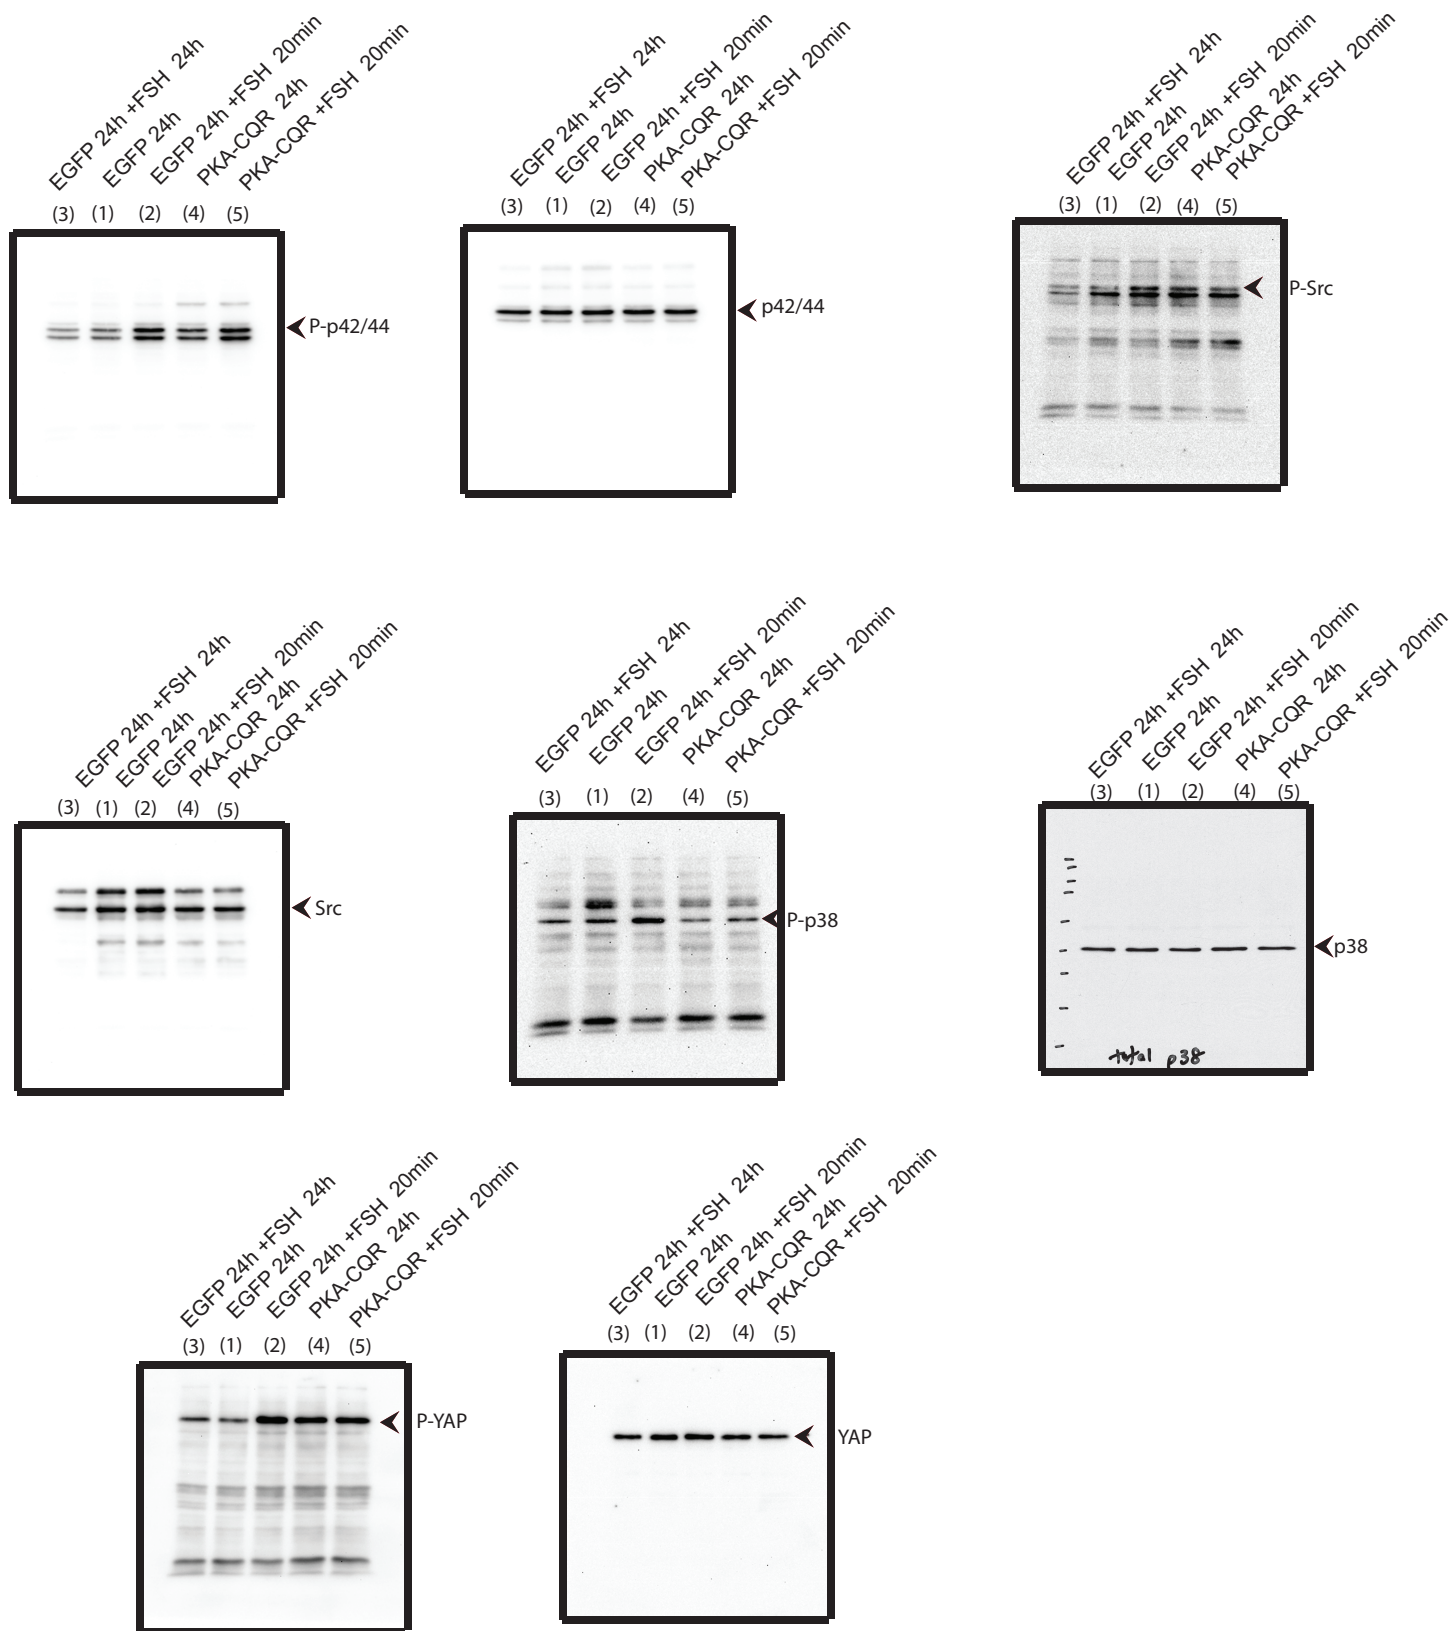

**Supplementary Table S1. Transcripts increased or decreased > 2-fold by either FSH or PKA-CQR**

| ID              | ENTREZ GENE NAME (Up-regulated Genes)                                            | FSH/C  | PKA-CQR/C | FSH/PKA |
|-----------------|----------------------------------------------------------------------------------|--------|-----------|---------|
| <i>scd1</i>     | stearoyl-CoA desaturase (delta-9-desaturase)                                     | 18.184 | 2.005     | 9.07    |
| <i>vcam1</i>    | vascular cell adhesion molecule 1                                                | 8.652  | 1.734     | 4.99    |
| <i>rgcc</i>     | regulator of cell cycle                                                          | 7.606  | 1.792     | 4.24    |
| <i>a2m</i>      | alpha-2-macroglobulin                                                            | 5.191  | 1.440     | 3.60    |
| RGD1565844      | ring finger protein 138, retrogene 1                                             | 7.157  | 2.144     | 3.34    |
| <i>tmem150c</i> | transmembrane protein 150C                                                       | 4.956  | 1.495     | 3.32    |
| <i>defb24</i>   | defensin, beta 119                                                               | 13.103 | 4.059     | 3.23    |
| <i>nfe2</i>     | nuclear factor, erythroid 2                                                      | 12.116 | 3.947     | 3.07    |
| <i>ttyh2</i>    | tweety family member 2                                                           | 5.340  | 1.884     | 2.83    |
| <i>eml1</i>     | echinoderm microtubule associated protein like 1                                 | 3.481  | 1.245     | 2.80    |
| <i>folr1</i>    | folate receptor 1 (adult)                                                        | 4.255  | 1.545     | 2.75    |
| <i>hamp</i>     | hepcidin antimicrobial peptide                                                   | 7.918  | 2.989     | 2.65    |
| <i>g0s2</i>     | G0/G1 switch 2                                                                   | 6.082  | 2.319     | 2.62    |
| <i>slc6a6</i>   | solute carrier family 6 (neurotransmitter transporter), member 6                 | 7.040  | 2.703     | 2.60    |
| <i>slc7a8</i>   | solute carrier family 7 (amino acid transporter light chain, L system), member 8 | 3.694  | 1.425     | 2.59    |
| <i>adamts9</i>  | ADAM metalloproteinase with thrombospondin type 1 motif, 9                       | 6.881  | 2.700     | 2.55    |
| <i>cxcr4</i>    | chemokine (C-X-C motif) receptor 4                                               | 13.944 | 5.487     | 2.54    |
| <i>kcnq5</i>    | potassium voltage-gated channel, KQT-like subfamily, member 5                    | 3.356  | 1.328     | 2.53    |
| <i>crisp1</i>   | cysteine-rich secretory protein 1                                                | 2.931  | 1.195     | 2.45    |
| <i>hla-dra</i>  | major histocompatibility complex, class II, DR alpha                             | 2.636  | 1.086     | 2.43    |
| <i>s100b</i>    | S100 calcium binding protein B                                                   | 4.113  | 1.724     | 2.39    |
| <i>chst1</i>    | carbohydrate (keratan sulfate Gal-6) sulfotransferase 1                          | 8.111  | 3.435     | 2.36    |
| <i>rbm47</i>    | RNA binding motif protein 47                                                     | 13.385 | 5.716     | 2.34    |
| <i>ccl2</i>     | chemokine (C-C motif) ligand 2                                                   | 2.507  | 1.079     | 2.32    |
| <i>exoc3l2</i>  | exocyst complex component 3-like 2                                               | 5.836  | 2.535     | 2.30    |
| <i>rnf125</i>   | ring finger protein 125, E3 ubiquitin protein ligase                             | 2.216  | 0.964     | 2.30    |
| <i>fdxr</i>     | ferredoxin reductase                                                             | 6.571  | 2.887     | 2.28    |
| <i>pdlim4</i>   | PDZ and LIM domain 4                                                             | 2.952  | 1.304     | 2.26    |
| <i>apln</i>     | apelin                                                                           | 6.109  | 2.711     | 2.25    |
| <i>orm1</i>     | orosomuroid 1                                                                    | 2.583  | 1.149     | 2.25    |
| <i>susd3</i>    | sushi domain containing 3                                                        | 4.260  | 1.912     | 2.23    |
| <i>pla2g1b</i>  | phospholipase A2, group IB (pancreas)                                            | 4.425  | 2.025     | 2.19    |
| <i>abcc9</i>    | ATP-binding cassette, sub-family C (CFTR/MRP), member 9                          | 5.650  | 2.586     | 2.18    |
| <i>bpifb6</i>   | BPI fold containing family B, member 6                                           | 2.484  | 1.141     | 2.18    |
| <i>cbr3</i>     | carbonyl reductase 3                                                             | 3.888  | 1.788     | 2.17    |
| <i>gas7</i>     | growth arrest-specific 7                                                         | 2.669  | 1.232     | 2.17    |
| <i>chrbn4</i>   | cholinergic receptor, nicotinic, beta 4 (neuronal)                               | 3.517  | 1.630     | 2.16    |
| <i>scn1b</i>    | sodium channel, voltage-gated, type I, beta subunit                              | 2.220  | 1.042     | 2.13    |
| <i>crabp2</i>   | cellular retinoic acid binding protein 2                                         | 14.101 | 6.640     | 2.12    |
| <i>hoga1</i>    | 4-hydroxy-2-oxoglutarate aldolase 1                                              | 2.366  | 1.120     | 2.11    |
| <i>lamb3</i>    | laminin, beta 3                                                                  | 3.334  | 1.590     | 2.10    |
| <i>hsd11b1</i>  | hydroxysteroid (11-beta) dehydrogenase 1                                         | 6.083  | 2.925     | 2.08    |
| <i>st8sia5</i>  | ST8 alpha-N-acetyl-neuraminide alpha-2,8-sialyltransferase 5                     | 2.637  | 1.289     | 2.05    |
| <i>cd74</i>     | CD74 molecule, major histocompatibility complex, class II invariant chain        | 2.297  | 1.128     | 2.04    |
| <i>tmem86a</i>  | transmembrane protein 86A                                                        | 11.081 | 5.558     | 1.99    |
| <i>eppin</i>    | EPPIN-WFDC6 readthrough                                                          | 5.488  | 2.764     | 1.99    |
| <i>tspan33</i>  | tetraspanin 33                                                                   | 2.498  | 1.264     | 1.98    |
| <i>fam195a</i>  | family with sequence similarity 195, member A                                    | 4.862  | 2.469     | 1.97    |
| <i>mt2a</i>     | metallothionein 2A                                                               | 4.664  | 2.372     | 1.97    |
| <i>tm7sf2</i>   | transmembrane 7 superfamily member 2                                             | 2.838  | 1.454     | 1.95    |

|                  |                                                                                 |        |       |      |
|------------------|---------------------------------------------------------------------------------|--------|-------|------|
| <i>kcnq1</i>     | potassium voltage-gated channel, KQT-like subfamily, member 1                   | 8.726  | 4.487 | 1.94 |
| <i>sgk1</i>      | serum/glucocorticoid regulated kinase 1                                         | 5.548  | 2.857 | 1.94 |
| <i>cldn11</i>    | claudin 11                                                                      | 5.075  | 2.641 | 1.92 |
| <i>id4</i>       | inhibitor of DNA binding 4, dominant negative helix-loop-helix protein          | 6.183  | 3.227 | 1.92 |
| <i>gprc5b</i>    | G protein-coupled receptor, class C, group 5, member B                          | 3.015  | 1.582 | 1.91 |
| <i>reep1</i>     | receptor accessory protein 1                                                    | 2.299  | 1.212 | 1.90 |
| <i>mmp19</i>     | matrix metalloproteinase 19                                                     | 3.000  | 1.585 | 1.89 |
| <i>mro</i>       | maestro                                                                         | 7.587  | 4.058 | 1.87 |
| <i>tlcd1</i>     | TLC domain containing 1                                                         | 2.697  | 1.446 | 1.87 |
| <i>mxra8</i>     | matrix-remodelling associated 8                                                 | 2.001  | 1.078 | 1.86 |
| <i>cml1</i>      | N-acetyltransferase 8B (GCN5-related, putative, gene/pseudogene)                | 3.006  | 1.642 | 1.83 |
| <i>mvd</i>       | mevalonate (diphospho) decarboxylase                                            | 2.847  | 1.557 | 1.83 |
| <i>tmem178b</i>  | transmembrane protein 178B                                                      | 4.387  | 2.400 | 1.83 |
| <i>nefh</i>      | neurofilament, heavy polypeptide                                                | 3.218  | 1.764 | 1.82 |
| <i>ubash3b</i>   | ubiquitin associated and SH3 domain containing B                                | 3.380  | 1.853 | 1.82 |
| <i>dclk1</i>     | doublecortin-like kinase 1                                                      | 2.063  | 1.133 | 1.82 |
| <i>ebp</i>       | emopamil binding protein (sterol isomerase)                                     | 2.183  | 1.201 | 1.82 |
| <i>rpp25</i>     | ribonuclease P/MRP 25kDa subunit                                                | 4.116  | 2.265 | 1.82 |
| RGD1308117       | chromosome 8 open reading frame 58                                              | 2.787  | 1.535 | 1.82 |
| <i>mrp</i>       | melanocortin 2 receptor accessory protein                                       | 10.419 | 5.781 | 1.80 |
| <i>gstm1</i>     | glutathione S-transferase mu 5                                                  | 2.711  | 1.505 | 1.80 |
| <i>efnb1</i>     | ephrin-B1                                                                       | 2.815  | 1.568 | 1.80 |
| <i>gda</i>       | guanine deaminase                                                               | 2.452  | 1.367 | 1.79 |
| RGD1305464       | chromosome 15 open reading frame 39                                             | 3.814  | 2.128 | 1.79 |
| <i>hopx</i>      | HOP homeobox                                                                    | 2.164  | 1.211 | 1.79 |
| <i>sgcg</i>      | sarcoglycan, gamma (35kDa dystrophin-associated glycoprotein)                   | 2.648  | 1.484 | 1.78 |
| <i>n4bp2l1</i>   | NEDD4 binding protein 2-like 1                                                  | 2.471  | 1.385 | 1.78 |
| <i>uhrf1bp1l</i> | UHRF1 binding protein 1-like                                                    | 2.708  | 1.531 | 1.77 |
| <i>agpat2</i>    | 1-acylglycerol-3-phosphate O-acyltransferase 2                                  | 2.131  | 1.205 | 1.77 |
| <i>aacs</i>      | acetoacetyl-CoA synthetase                                                      | 2.264  | 1.285 | 1.76 |
| <i>kcnq2</i>     | potassium voltage-gated channel, subfamily G, member 2                          | 3.097  | 1.760 | 1.76 |
| <i>ppl</i>       | periplakin                                                                      | 3.739  | 2.128 | 1.76 |
| <i>nt5e</i>      | 5'-nucleotidase, ecto (CD73)                                                    | 5.112  | 2.910 | 1.76 |
| <i>sepp1</i>     | selenoprotein P, plasma, 1                                                      | 3.086  | 1.760 | 1.75 |
| <i>ppm1l</i>     | protein phosphatase, Mg2+/Mn2+ dependent, 1L                                    | 2.902  | 1.658 | 1.75 |
| <i>cyp4f4</i>    | cytochrome P450, family 4, subfamily F, polypeptide 8                           | 3.229  | 1.848 | 1.75 |
| <i>mafB</i>      | v-maf avian musculoaponeurotic fibrosarcoma oncogene homolog B                  | 2.823  | 1.620 | 1.74 |
| <i>hpgd</i>      | hydroxyprostaglandin dehydrogenase 15-(NAD)                                     | 4.152  | 2.390 | 1.74 |
| <i>rora</i>      | RAR-related orphan receptor A                                                   | 2.148  | 1.240 | 1.73 |
| <i>aox1</i>      | aldehyde oxidase 1                                                              | 3.590  | 2.075 | 1.73 |
| <i>timp3</i>     | TIMP metalloproteinase inhibitor 3                                              | 2.147  | 1.242 | 1.73 |
| <i>neu2</i>      | sialidase 2 (cytosolic sialidase)                                               | 2.078  | 1.209 | 1.72 |
| <i>ddit4</i>     | DNA-damage-inducible transcript 4                                               | 14.896 | 8.669 | 1.72 |
| <i>sema6d</i>    | sema domain, transmembrane domain (TM), and cytoplasmic domain, (semaphorin) 6D | 3.443  | 2.005 | 1.72 |
| <i>kcnt1</i>     | potassium channel, subfamily T, member 1                                        | 3.137  | 1.830 | 1.71 |
| <i>ptpn5</i>     | protein tyrosine phosphatase, non-receptor type 5 (striatum-enriched)           | 2.148  | 1.255 | 1.71 |
| <i>cmb1</i>      | carboxymethylenebutenolidase homolog (Pseudomonas)                              | 2.485  | 1.461 | 1.70 |
| <i>nppc</i>      | natriuretic peptide C                                                           | 5.824  | 3.428 | 1.70 |
| <i>aldh1l1</i>   | aldehyde dehydrogenase 1 family, member L1                                      | 2.062  | 1.217 | 1.69 |
| <i>gstm7</i>     | glutathione S-transferase mu 2 (muscle)                                         | 4.114  | 2.430 | 1.69 |
| <i>cbfa2t3</i>   | core-binding factor, runt domain, alpha subunit 2; translocated to, 3           | 4.469  | 2.657 | 1.68 |
| <i>klhdc8a</i>   | kelch domain containing 8A                                                      | 2.030  | 1.210 | 1.68 |
| <i>fam110b</i>   | family with sequence similarity 110, member B                                   | 2.023  | 1.206 | 1.68 |
| <i>nr0b2</i>     | nuclear receptor subfamily 0, group B, member 2                                 | 2.773  | 1.670 | 1.66 |
| <i>id2</i>       | inhibitor of DNA binding 2, dominant negative helix-loop-helix protein          | 2.308  | 1.394 | 1.66 |
| <i>entpd5</i>    | ectonucleoside triphosphate diphosphohydrolase 5                                | 2.082  | 1.264 | 1.65 |

|                 |                                                                     |        |        |      |
|-----------------|---------------------------------------------------------------------|--------|--------|------|
| <i>hsd11b2</i>  | hydroxysteroid (11-beta) dehydrogenase 2                            | 3.511  | 2.134  | 1.65 |
| <i>cml5</i>     | camello-like 5                                                      | 6.102  | 3.712  | 1.64 |
| <i>flvcr2</i>   | feline leukemia virus subgroup C cellular receptor family, member 2 | 3.682  | 2.248  | 1.64 |
| <i>notch1</i>   | notch 1                                                             | 2.266  | 1.384  | 1.64 |
| <i>mir351</i>   | microRNA 351                                                        | 5.162  | 3.154  | 1.64 |
| <i>pgap2</i>    | post-GPI attachment to proteins 2                                   | 2.311  | 1.413  | 1.64 |
| <i>fkbp5</i>    | FK506 binding protein 5                                             | 2.821  | 1.726  | 1.63 |
| <i>ass1</i>     | argininosuccinate synthase 1                                        | 18.488 | 11.350 | 1.63 |
| <i>enpp1</i>    | ectonucleotide pyrophosphatase/phosphodiesterase 1                  | 2.030  | 1.249  | 1.63 |
| <i>unc79</i>    | unc-79 homolog (C. elegans)                                         | 3.361  | 2.068  | 1.63 |
| <i>upk1b</i>    | uroplakin 1B                                                        | 4.040  | 2.488  | 1.62 |
| <i>map7d2</i>   | MAP7 domain containing 2                                            | 2.419  | 1.495  | 1.62 |
| <i>litaf</i>    | lipopolysaccharide-induced TNF factor                               | 4.049  | 2.503  | 1.62 |
| <i>appbp2</i>   | amyloid beta precursor protein (cytoplasmic tail) binding protein 2 | 2.389  | 1.477  | 1.62 |
| <i>iqgap2</i>   | IQ motif containing GTPase activating protein 2                     | 2.149  | 1.333  | 1.61 |
| <i>aldh3b1</i>  | aldehyde dehydrogenase 3 family, member B1                          | 2.085  | 1.295  | 1.61 |
| <i>nqo1</i>     | NAD(P)H dehydrogenase, quinone 1                                    | 3.117  | 1.942  | 1.61 |
| <i>osgin1</i>   | oxidative stress induced growth inhibitor 1                         | 17.605 | 10.993 | 1.60 |
| <i>rbks</i>     | ribokinase                                                          | 2.193  | 1.372  | 1.60 |
| <i>dnajc15</i>  | DnaJ (Hsp40) homolog, subfamily C, member 15                        | 2.760  | 1.727  | 1.60 |
| <i>clint1</i>   | clathrin interactor 1                                               | 2.200  | 1.379  | 1.60 |
| <i>mmd2</i>     | monocyte to macrophage differentiation-associated 2                 | 7.769  | 4.870  | 1.60 |
| <i>tmem178a</i> | transmembrane protein 178A                                          | 5.522  | 3.466  | 1.59 |
| <i>plac1</i>    | placenta-specific 1                                                 | 3.486  | 2.197  | 1.59 |
| <i>adck3</i>    | aarF domain containing kinase 3                                     | 2.212  | 1.398  | 1.58 |
| <i>actr6</i>    | ARP6 actin-related protein 6 homolog (yeast)                        | 2.509  | 1.586  | 1.58 |
| <i>b4galt6</i>  | UDP-Gal:betaGlcNAc beta 1,4- galactosyltransferase, polypeptide 6   | 3.001  | 1.901  | 1.58 |
| <i>rmdn2</i>    | regulator of microtubule dynamics 2                                 | 4.980  | 3.157  | 1.58 |
| <i>mob4</i>     | MOB family member 4, phocein                                        | 3.052  | 1.947  | 1.57 |
| <i>soat1</i>    | sterol O-acyltransferase 1                                          | 2.585  | 1.650  | 1.57 |
| <i>reep2</i>    | receptor accessory protein 2                                        | 3.066  | 1.959  | 1.57 |
| <i>inmt</i>     | indolethylamine N-methyltransferase                                 | 24.402 | 15.640 | 1.56 |
| <i>star</i>     | steroidogenic acute regulatory protein                              | 14.132 | 9.110  | 1.55 |
| <i>parm1</i>    | prostate androgen-regulated mucin-like protein 1                    | 6.033  | 3.908  | 1.54 |
| <i>ccdc69</i>   | coiled-coil domain containing 69                                    | 2.997  | 1.942  | 1.54 |
| <i>calml3</i>   | calmodulin-like 3                                                   | 10.546 | 6.842  | 1.54 |
| <i>aldh2</i>    | aldehyde dehydrogenase 2 family (mitochondrial)                     | 2.422  | 1.574  | 1.54 |
| <i>fbxo16</i>   | F-box protein 16                                                    | 2.169  | 1.412  | 1.54 |
| <i>scara5</i>   | scavenger receptor class A, member 5 (putative)                     | 7.304  | 4.757  | 1.54 |
| <i>dcxr</i>     | dicarbonyl/L-xylulose reductase                                     | 2.411  | 1.580  | 1.53 |
| <i>c1qtnf1</i>  | C1q and tumor necrosis factor related protein 1                     | 2.209  | 1.455  | 1.52 |
| <i>pc</i>       | pyruvate carboxylase                                                | 2.144  | 1.416  | 1.51 |
| <i>rab3a</i>    | RAB3A, member RAS oncogene family                                   | 2.218  | 1.466  | 1.51 |
| <i>lss</i>      | lanosterol synthase (2,3-oxidosqualene-lanosterol cyclase)          | 2.137  | 1.418  | 1.51 |
| <i>gramd1b</i>  | GRAM domain containing 1B                                           | 3.233  | 2.147  | 1.51 |
| <i>fads2</i>    | fatty acid desaturase 2                                             | 2.500  | 1.661  | 1.51 |
| <i>wwp2</i>     | WW domain containing E3 ubiquitin protein ligase 2                  | 3.864  | 2.589  | 1.49 |
| <i>fam69b</i>   | family with sequence similarity 69, member B                        | 2.165  | 1.452  | 1.49 |
| <i>mvk</i>      | mevalonate kinase                                                   | 2.105  | 1.414  | 1.49 |
| <i>fbxo2</i>    | F-box protein 2                                                     | 2.520  | 1.697  | 1.48 |
| <i>hist1h4h</i> | histone cluster 1, H4h                                              | 2.604  | 1.754  | 1.48 |
| <i>spin2a</i>   | spindlin family, member 2C                                          | 2.648  | 1.790  | 1.48 |
| <i>slfn3</i>    | schlafen family member 12                                           | 3.289  | 2.224  | 1.48 |
| <i>uxs1</i>     | UDP-glucuronate decarboxylase 1                                     | 2.558  | 1.731  | 1.48 |
| <i>nudt10</i>   | nudix (nucleoside diphosphate linked moiety X)-type motif 11        | 2.172  | 1.473  | 1.47 |

|                 |                                                                                     |        |        |      |
|-----------------|-------------------------------------------------------------------------------------|--------|--------|------|
| <i>tfr</i>      | transferrin receptor                                                                | 2.526  | 1.717  | 1.47 |
| <i>smco4</i>    | single-pass membrane protein with coiled-coil domains 4                             | 2.243  | 1.526  | 1.47 |
| <i>ptplb</i>    | protein tyrosine phosphatase-like (proline instead of catalytic arginine), member b | 2.557  | 1.748  | 1.46 |
| <i>sphk1</i>    | sphingosine kinase 1                                                                | 2.573  | 1.765  | 1.46 |
| <i>slc16a6</i>  | solute carrier family 16, member 6                                                  | 3.632  | 2.496  | 1.46 |
| <i>gal</i>      | galanin/GMAP prepropeptide                                                          | 5.008  | 3.444  | 1.45 |
| <i>adam8</i>    | ADAM metalloproteinase domain 8                                                     | 2.013  | 1.388  | 1.45 |
| RGD1563510      | similar to RIKEN cDNA 8430427H17 gene                                               | 2.078  | 1.435  | 1.45 |
| <i>ier5l</i>    | immediate early response 5-like                                                     | 2.020  | 1.397  | 1.45 |
| <i>gsta3</i>    | glutathione S-transferase alpha 3                                                   | 2.531  | 1.754  | 1.44 |
| <i>sbk1</i>     | SH3 domain binding kinase 1                                                         | 2.767  | 1.919  | 1.44 |
| <i>mt3</i>      | metallothionein 3                                                                   | 2.129  | 1.479  | 1.44 |
| <i>abca1</i>    | ATP-binding cassette, sub-family A (ABC1), member 1                                 | 2.262  | 1.573  | 1.44 |
| <i>adam19</i>   | ADAM metalloproteinase domain 19                                                    | 2.779  | 1.940  | 1.43 |
| <i>reep6</i>    | receptor accessory protein 6                                                        | 2.840  | 1.986  | 1.43 |
| <i>xpnpep2</i>  | X-prolyl aminopeptidase (aminopeptidase P) 2, membrane-bound                        | 2.270  | 1.589  | 1.43 |
| <i>clcf1</i>    | cardiotrophin-like cytokine factor 1                                                | 3.609  | 2.536  | 1.42 |
| <i>tgfb1</i>    | transforming growth factor, beta-induced, 68kDa                                     | 3.860  | 2.714  | 1.42 |
| <i>leprel4</i>  | leprecan-like 4                                                                     | 2.001  | 1.416  | 1.41 |
| <i>il18</i>     | interleukin 18                                                                      | 4.042  | 2.864  | 1.41 |
| <i>cyp11a1</i>  | cytochrome P450, family 11, subfamily A, polypeptide 1                              | 51.313 | 36.405 | 1.41 |
| <i>gstm5</i>    | glutathione S-transferase mu 3 (brain)                                              | 2.010  | 1.427  | 1.41 |
| <i>fdft1</i>    | farnesyl-diphosphate farnesyltransferase 1                                          | 2.826  | 2.007  | 1.41 |
| <i>gale</i>     | UDP-galactose-4-epimerase                                                           | 2.500  | 1.780  | 1.40 |
| <i>fam122b</i>  | family with sequence similarity 122B                                                | 3.346  | 2.390  | 1.40 |
| <i>gch1</i>     | GTP cyclohydrolase 1                                                                | 9.003  | 6.437  | 1.40 |
| <i>aig1</i>     | androgen-induced 1                                                                  | 2.156  | 1.542  | 1.40 |
| <i>epha2</i>    | EPH receptor A2                                                                     | 2.126  | 1.522  | 1.40 |
| <i>galnt7</i>   | polypeptide N-acetylgalactosaminyltransferase 7                                     | 2.126  | 1.524  | 1.40 |
| <i>cgnl1</i>    | cingulin-like 1                                                                     | 3.923  | 2.813  | 1.39 |
| <i>id1</i>      | inhibitor of DNA binding 1, dominant negative helix-loop-helix protein              | 2.852  | 2.050  | 1.39 |
| <i>phyh</i>     | phytanoyl-CoA 2-hydroxylase                                                         | 2.286  | 1.647  | 1.39 |
| <i>mapkapk3</i> | mitogen-activated protein kinase-activated protein kinase 3                         | 2.231  | 1.608  | 1.39 |
| <i>gamt</i>     | guanidinoacetate N-methyltransferase                                                | 2.016  | 1.454  | 1.39 |
| <i>tsx</i>      | testis specific X-linked gene                                                       | 2.046  | 1.476  | 1.39 |
| <i>irak2</i>    | interleukin-1 receptor-associated kinase 2                                          | 3.532  | 2.552  | 1.38 |
| <i>fuca1</i>    | fucosidase, alpha-L- 1, tissue                                                      | 2.441  | 1.764  | 1.38 |
| <i>sfxn5</i>    | sideroflexin 5                                                                      | 2.160  | 1.565  | 1.38 |
| <i>baiap2</i>   | BAI1-associated protein 2                                                           | 2.618  | 1.897  | 1.38 |
| <i>cotl1</i>    | coactosin-like F-actin binding protein 1                                            | 11.008 | 7.983  | 1.38 |
| <i>sh3tc2</i>   | SH3 domain and tetratricopeptide repeats 2                                          | 2.066  | 1.499  | 1.38 |
| <i>exoc3l1</i>  | exocyst complex component 3-like 1                                                  | 2.064  | 1.499  | 1.38 |
| <i>lcn2</i>     | lipocalin 2                                                                         | 3.111  | 2.261  | 1.38 |
| <i>acs13</i>    | acyl-CoA synthetase long-chain family member 3                                      | 2.137  | 1.562  | 1.37 |
| LOC363060       |                                                                                     | 2.175  | 1.591  | 1.37 |
| <i>lpcat3</i>   | lysophosphatidylcholine acyltransferase 3                                           | 2.488  | 1.823  | 1.36 |
| <i>tekt1</i>    | tektin 1                                                                            | 2.332  | 1.710  | 1.36 |
| <i>dlgap1</i>   | discs, large (Drosophila) homolog-associated protein 1                              | 2.008  | 1.474  | 1.36 |
| <i>bdh1</i>     | 3-hydroxybutyrate dehydrogenase, type 1                                             | 2.001  | 1.476  | 1.36 |
| <i>anp32e</i>   | acidic (leucine-rich) nuclear phosphoprotein 32 family, member E                    | 2.423  | 1.789  | 1.35 |
| <i>msmo1</i>    | methylsterol monooxygenase 1                                                        | 2.020  | 1.493  | 1.35 |
| <i>wipf3</i>    | WAS/WASL interacting protein family, member 3                                       | 2.159  | 1.596  | 1.35 |
| <i>slc25a1</i>  | solute carrier family 25 (mitochondrial carrier, citrate transporter), member 1     | 2.099  | 1.553  | 1.35 |
| <i>slc25a21</i> | solute carrier family 25 (mitochondrial oxoadipate carrier), member 21              | 4.359  | 3.226  | 1.35 |
| <i>epb41l1</i>  | erythrocyte membrane protein band 4.1-like 1                                        | 2.118  | 1.570  | 1.35 |
| <i>il4r</i>     | interleukin 4 receptor                                                              | 2.260  | 1.677  | 1.35 |



|                 |                                                                                                |        |        |      |
|-----------------|------------------------------------------------------------------------------------------------|--------|--------|------|
| <i>hpcal1</i>   | hippocalcin-like 1                                                                             | 2.037  | 1.513  | 1.35 |
| LOC688328       |                                                                                                | 3.868  | 2.880  | 1.34 |
| <i>msi2</i>     | musashi RNA-binding protein 2                                                                  | 2.434  | 1.816  | 1.34 |
| <i>scarb1</i>   | scavenger receptor class B, member 1                                                           | 25.153 | 18.772 | 1.34 |
| <i>pcsk9</i>    | proprotein convertase subtilisin/kexin type 9                                                  | 2.150  | 1.608  | 1.34 |
| <i>prlr</i>     | prolactin receptor                                                                             | 5.444  | 4.084  | 1.33 |
| <i>fam102a</i>  | family with sequence similarity 102, member A                                                  | 2.011  | 1.510  | 1.33 |
| <i>cybb</i>     | cytochrome b-245, beta polypeptide                                                             | 2.988  | 2.255  | 1.33 |
| <i>slc25a30</i> | solute carrier family 25, member 30                                                            | 5.561  | 4.199  | 1.32 |
| <i>dhcr7</i>    | 7-dehydrocholesterol reductase                                                                 | 2.860  | 2.163  | 1.32 |
| <i>lmo2</i>     | LIM domain only 2 (rhombotin-like 1)                                                           | 2.919  | 2.208  | 1.32 |
| <i>npas2</i>    | neuronal PAS domain protein 2                                                                  | 7.096  | 5.368  | 1.32 |
| <i>fhdc1</i>    | FH2 domain containing 1                                                                        | 2.098  | 1.589  | 1.32 |
| <i>cxcl12</i>   | chemokine (C-X-C motif) ligand 12                                                              | 2.444  | 1.855  | 1.32 |
| <i>sod2</i>     | superoxide dismutase 2, mitochondrial                                                          | 2.733  | 2.080  | 1.31 |
| <i>aadat</i>    | aminoadipate aminotransferase                                                                  | 3.434  | 2.614  | 1.31 |
| <i>acat2</i>    | acetyl-CoA acetyltransferase 2                                                                 | 2.261  | 1.723  | 1.31 |
| <i>nt5c3b</i>   | 5'-nucleotidase, cytosolic IIIB                                                                | 2.008  | 1.536  | 1.31 |
| <i>pla2g4a</i>  | phospholipase A2, group IVA (cytosolic, calcium-dependent)                                     | 4.061  | 3.119  | 1.30 |
| <i>cobl1</i>    | cordon-bleu WH2 repeat protein-like 1                                                          | 2.026  | 1.558  | 1.30 |
| <i>isyna1</i>   | inositol-3-phosphate synthase 1                                                                | 3.369  | 2.592  | 1.30 |
| <i>runx1</i>    | runt-related transcription factor 1                                                            | 3.459  | 2.687  | 1.29 |
| <i>nkain3</i>   | Na <sup>+</sup> /K <sup>+</sup> transporting ATPase interacting 3                              | 2.071  | 1.610  | 1.29 |
| <i>hspd1</i>    | heat shock 60kDa protein 1 (chaperonin)                                                        | 2.350  | 1.832  | 1.28 |
| <i>reg3g</i>    | regenerating islet-derived 3 gamma                                                             | 2.437  | 1.900  | 1.28 |
| <i>snapc1</i>   | small nuclear RNA activating complex, polypeptide 1, 43kDa                                     | 2.097  | 1.639  | 1.28 |
| <i>fasn</i>     | fatty acid synthase                                                                            | 2.135  | 1.670  | 1.28 |
| LOC100359971    | hypothetical protein LOC100359971                                                              | 2.309  | 1.810  | 1.28 |
| <i>herpud1</i>  | homocysteine-inducible, endoplasmic reticulum stress-inducible, ubiquitin-like domain member 1 | 2.329  | 1.827  | 1.27 |
| LOC689176       | similar to transmembrane protein 64                                                            | 2.870  | 2.255  | 1.27 |
| <i>dusp15</i>   | dual specificity phosphatase 15                                                                | 2.025  | 1.592  | 1.27 |
| <i>abhd13</i>   | abhydrolase domain containing 13                                                               | 2.491  | 1.966  | 1.27 |
| <i>srebf1</i>   | sterol regulatory element binding transcription factor 1                                       | 2.277  | 1.800  | 1.27 |
| <i>csdc2</i>    | cold shock domain containing C2, RNA binding                                                   | 2.501  | 1.982  | 1.26 |
| <i>hmgcs1</i>   | 3-hydroxy-3-methylglutaryl-CoA synthase 1 (soluble)                                            | 2.232  | 1.769  | 1.26 |
| <i>net1</i>     | neuroepithelial cell transforming 1                                                            | 3.361  | 2.669  | 1.26 |
| <i>nfkbib</i>   | nuclear factor of kappa light polypeptide gene enhancer in B-cells inhibitor, beta             | 2.052  | 1.631  | 1.26 |
| <i>mfge8</i>    | milk fat globule-EGF factor 8 protein                                                          | 2.019  | 1.607  | 1.26 |
| <i>lppr5</i>    | lipid phosphate phosphatase-related protein type 5                                             | 2.399  | 1.917  | 1.25 |
| <i>nr5a2</i>    | nuclear receptor subfamily 5, group A, member 2                                                | 2.350  | 1.884  | 1.25 |
| <i>hspe1</i>    | heat shock 10kDa protein 1                                                                     | 2.340  | 1.887  | 1.24 |
| <i>stard4</i>   | StAR-related lipid transfer (START) domain containing 4                                        | 2.470  | 1.992  | 1.24 |
| <i>plxnc1</i>   | plexin C1                                                                                      | 3.342  | 2.698  | 1.24 |
| <i>sqle</i>     | squalene epoxidase                                                                             | 2.423  | 1.960  | 1.24 |
| <i>fzd8</i>     | frizzled class receptor 8                                                                      | 2.156  | 1.745  | 1.24 |
| <i>rnase4</i>   | ribonuclease, RNase A family, 4                                                                | 2.301  | 1.870  | 1.23 |
| <i>nr1h3</i>    | nuclear receptor subfamily 1, group H, member 3                                                | 2.440  | 1.983  | 1.23 |
| <i>fam46c</i>   | family with sequence similarity 46, member C                                                   | 3.810  | 3.100  | 1.23 |
| <i>filip1</i>   | filamin A interacting protein 1                                                                | 4.034  | 3.286  | 1.23 |
| <i>etnk2</i>    | ethanolamine kinase 2                                                                          | 3.136  | 2.556  | 1.23 |
| <i>madd</i>     | MAP-kinase activating death domain                                                             | 2.099  | 1.733  | 1.21 |
| <i>fam110c</i>  | family with sequence similarity 110, member C                                                  | 38.404 | 31.807 | 1.21 |
| <i>micall2</i>  | MICAL-like 2                                                                                   | 2.848  | 2.372  | 1.20 |
| <i>ptplad1</i>  | protein tyrosine phosphatase-like A domain containing 1                                        | 3.308  | 2.757  | 1.20 |
| <i>cx3cl1</i>   | chemokine (C-X3-C motif) ligand 1                                                              | 2.368  | 1.975  | 1.20 |
| <i>efhd1</i>    | EF-hand domain family, member D1                                                               | 2.241  | 1.870  | 1.20 |

|                 |                                                                      |        |        |      |
|-----------------|----------------------------------------------------------------------|--------|--------|------|
| <i>gfpt2</i>    | glutamine-fructose-6-phosphate transaminase 2                        | 5.369  | 4.482  | 1.20 |
| <i>creb3l1</i>  | cAMP responsive element binding protein 3-like 1                     | 3.667  | 3.069  | 1.19 |
| <i>tns4</i>     | tensin 4                                                             | 2.418  | 2.037  | 1.19 |
| <i>hist1h3h</i> | histone cluster 1, H3h                                               | 2.189  | 1.851  | 1.18 |
| <i>por</i>      | P450 (cytochrome) oxidoreductase                                     | 2.301  | 1.951  | 1.18 |
| <i>map7</i>     | microtubule-associated protein 7                                     | 2.234  | 1.903  | 1.17 |
| <i>crispld2</i> | cysteine-rich secretory protein LCCL domain containing 2             | 2.445  | 2.092  | 1.17 |
| <i>tle3</i>     | transducin-like enhancer of split 3                                  | 2.114  | 1.814  | 1.17 |
| <i>me2</i>      | malic enzyme 2, NAD(+)-dependent, mitochondrial                      | 2.240  | 1.927  | 1.16 |
| <i>itga1</i>    | integrin, alpha 1                                                    | 2.164  | 1.866  | 1.16 |
| <i>rasd1</i>    | RAS, dexamethasone-induced 1                                         | 6.524  | 5.669  | 1.15 |
| <i>ccl5</i>     | chemokine (C-C motif) ligand 5                                       | 3.064  | 2.666  | 1.15 |
| <i>nr5a1</i>    | nuclear receptor subfamily 5, group A, member 1                      | 2.356  | 2.051  | 1.15 |
| <i>btbd11</i>   | BTB (POZ) domain containing 11                                       | 3.000  | 2.622  | 1.14 |
| <i>cyp51</i>    | cytochrome P450, family 51, subfamily A, polypeptide 1               | 2.127  | 1.861  | 1.14 |
| <i>cebpb</i>    | CCAAT/enhancer binding protein (C/EBP), beta                         | 2.020  | 1.769  | 1.14 |
| <i>per1</i>     | period circadian clock 1                                             | 2.143  | 1.880  | 1.14 |
| <i>aldh1a3</i>  | aldehyde dehydrogenase 1 family, member A3                           | 3.873  | 3.404  | 1.14 |
| <i>idi1</i>     | isopentenyl-diphosphate delta isomerase 1                            | 2.783  | 2.446  | 1.14 |
| <i>phactr1</i>  | phosphatase and actin regulator 1                                    | 2.074  | 1.833  | 1.13 |
| <i>adipor2</i>  | adiponectin receptor 2                                               | 2.157  | 1.908  | 1.13 |
| <i>mageb16</i>  | melanoma antigen family B, 16                                        | 3.454  | 3.058  | 1.13 |
| <i>ifi27l2b</i> | interferon, alpha-inducible protein 27 like 2B                       | 2.066  | 1.849  | 1.12 |
| <i>hunk</i>     | hormonally up-regulated Neu-associated kinase                        | 2.361  | 2.123  | 1.11 |
| <i>inhba</i>    | inhibin, beta A                                                      | 2.765  | 2.501  | 1.11 |
| <i>fdx1</i>     | ferredoxin 1                                                         | 8.319  | 7.526  | 1.11 |
| <i>sox18</i>    | SRY (sex determining region Y)-box 18                                | 2.920  | 2.642  | 1.11 |
| <i>cd40</i>     | CD40 molecule, TNF receptor superfamily member 5                     | 2.343  | 2.126  | 1.10 |
| <i>st3gal4</i>  | ST3 beta-galactoside alpha-2,3-sialyltransferase 4                   | 2.304  | 2.091  | 1.10 |
| <i>alas1</i>    | aminolevulinate, delta-, synthase 1                                  | 7.027  | 6.384  | 1.10 |
| <i>rps6ka5</i>  | ribosomal protein S6 kinase, polypeptide 5                           | 2.513  | 2.286  | 1.10 |
| <i>rasal1</i>   | RAS protein activator like 1 (GAP1 like)                             | 2.790  | 2.540  | 1.10 |
| <i>brd8</i>     | bromodomain containing 8                                             | 2.688  | 2.449  | 1.10 |
| RGD1561113      | chromosome 9 open reading frame 16                                   | 2.276  | 2.074  | 1.10 |
| <i>hsd17b7</i>  | hydroxysteroid (17-beta) dehydrogenase 7                             | 2.841  | 2.592  | 1.10 |
| <i>thrb</i>     | thyroid hormone receptor, beta                                       | 2.248  | 2.051  | 1.10 |
| <i>slc22a23</i> | solute carrier family 22, member 23                                  | 2.099  | 1.916  | 1.10 |
| <i>bcat1</i>    | branched chain amino-acid transaminase 1, cytosolic                  | 2.378  | 2.190  | 1.09 |
| <i>slc25a28</i> | solute carrier family 25 (mitochondrial iron transporter), member 28 | 2.002  | 1.857  | 1.08 |
| <i>gde1</i>     | glycerophosphodiester phosphodiesterase 1                            | 2.363  | 2.206  | 1.07 |
| <i>gclc</i>     | glutamate-cysteine ligase, catalytic subunit                         | 2.012  | 1.880  | 1.07 |
| <i>tmem97</i>   | transmembrane protein 97                                             | 2.471  | 2.309  | 1.07 |
| <i>nabp1</i>    | nucleic acid binding protein 1                                       | 2.047  | 1.914  | 1.07 |
| <i>srxn1</i>    | sulfiredoxin 1                                                       | 3.015  | 2.850  | 1.06 |
| <i>enc1</i>     | ectodermal-neural cortex 1 (with BTB domain)                         | 4.896  | 4.635  | 1.06 |
| <i>ptgds</i>    | prostaglandin D2 synthase 21kDa (brain)                              | 13.259 | 12.594 | 1.05 |
| <i>acsbg1</i>   | acyl-CoA synthetase bubblegum family member 1                        | 2.564  | 2.455  | 1.04 |
| <i>lama4</i>    | laminin, alpha 4                                                     | 2.139  | 2.053  | 1.04 |
| <i>ext1</i>     | exostosin glycosyltransferase 1                                      | 2.166  | 2.079  | 1.04 |
| <i>cxcr7</i>    | atypical chemokine receptor 3                                        | 2.925  | 2.810  | 1.04 |
| <i>nefm</i>     | neurofilament, medium polypeptide                                    | 2.052  | 1.976  | 1.04 |
| <i>hey2</i>     | hes-related family bHLH transcription factor with YRPW motif 2       | 4.250  | 4.138  | 1.03 |
| <i>gata4</i>    | GATA binding protein 4                                               | 2.307  | 2.251  | 1.02 |
| <i>inhbb</i>    | inhibin, beta B                                                      | 3.435  | 3.353  | 1.02 |
| <i>inha</i>     | inhibin, alpha                                                       | 2.431  | 2.406  | 1.01 |
| <i>pcdh18</i>   | protocadherin 18                                                     | 3.367  | 3.342  | 1.01 |

|                |                                                                                     |        |        |      |
|----------------|-------------------------------------------------------------------------------------|--------|--------|------|
| <i>prss35</i>  | protease, serine, 35                                                                | 2.147  | 2.134  | 1.01 |
| <i>galnt6</i>  | polypeptide N-acetylgalactosaminyltransferase 6                                     | 2.117  | 2.112  | 1.00 |
| <i>egfr</i>    | epidermal growth factor receptor                                                    | 2.034  | 2.043  | 1.00 |
| <i>gjb2</i>    | gap junction protein, beta 2, 26kDa                                                 | 6.820  | 6.872  | 0.99 |
| <i>tmem45a</i> | transmembrane protein 45A                                                           | 2.072  | 2.115  | 0.98 |
| <i>fam43a</i>  | family with sequence similarity 43, member A                                        | 2.016  | 2.069  | 0.97 |
| <i>Orc1</i>    | origin recognition complex, subunit 1                                               | 1.956  | 2.025  | 0.97 |
| <i>car14</i>   | carbonic anhydrase XIV                                                              | 2.337  | 2.441  | 0.96 |
| <i>kcne4</i>   | potassium voltage-gated channel, Isk-related family, member 4                       | 4.184  | 4.416  | 0.95 |
| <i>giot1</i>   | gonadotropin inducible ovarian transcription factor 1                               | 5.711  | 6.072  | 0.94 |
| <i>gdf11</i>   | growth differentiation factor 11                                                    | 1.931  | 2.057  | 0.94 |
| LOC100910792   | amphiphysin                                                                         | 3.053  | 3.299  | 0.93 |
| <i>hsd17b1</i> | hydroxysteroid (17-beta) dehydrogenase 1                                            | 3.218  | 3.481  | 0.92 |
| <i>rrm2</i>    | ribonucleotide reductase M2                                                         | 2.000  | 2.167  | 0.92 |
| <i>oasl</i>    | 2'-5'-oligoadenylate synthetase-like                                                | 2.044  | 2.220  | 0.92 |
| <i>cldn10</i>  | claudin 10                                                                          | 7.175  | 7.800  | 0.92 |
| <i>Ccrn4l</i>  | CCR4 carbon catabolite repression 4-like ( <i>S. cerevisiae</i> )                   | 1.948  | 2.120  | 0.92 |
| <i>vcan</i>    | versican                                                                            | 2.053  | 2.238  | 0.92 |
| <i>rgs2</i>    | regulator of G-protein signaling 2, 24kDa                                           | 3.479  | 3.793  | 0.92 |
| <i>Ccnd2</i>   | cyclin D2                                                                           | 1.937  | 2.120  | 0.91 |
| <i>clmp</i>    | CXADR-like membrane protein                                                         | 3.627  | 3.971  | 0.91 |
| <i>dync1i1</i> | dynein, cytoplasmic 1, intermediate chain 1                                         | 2.344  | 2.579  | 0.91 |
| <i>plau</i>    | plasminogen activator, urokinase                                                    | 2.244  | 2.475  | 0.91 |
| <i>chst2</i>   | carbohydrate (N-acetylglucosamine-6-O) sulfotransferase 2                           | 2.577  | 2.901  | 0.89 |
| <i>grk5</i>    | G protein-coupled receptor kinase 5                                                 | 3.056  | 3.476  | 0.88 |
| <i>dyrk3</i>   | dual-specificity tyrosine-(Y)-phosphorylation regulated kinase 3                    | 2.627  | 3.031  | 0.87 |
| <i>sik1</i>    | salt inducible kinase 1                                                             | 2.248  | 2.598  | 0.87 |
| <i>chst8</i>   | carbohydrate (N-acetylgalactosamine 4-O) sulfotransferase 8                         | 3.028  | 3.533  | 0.86 |
| <i>cthrc1</i>  | collagen triple helix repeat containing 1                                           | 2.053  | 2.411  | 0.85 |
| <i>dcaf12</i>  | DDB1 and CUL4 associated factor 12-like 1                                           | 2.065  | 2.431  | 0.85 |
| <i>ihh</i>     | indian hedgehog                                                                     | 2.363  | 2.808  | 0.84 |
| <i>crem</i>    | cAMP responsive element modulator                                                   | 3.300  | 3.966  | 0.83 |
| <i>kif22</i>   | kinesin family member 22                                                            | 2.172  | 2.615  | 0.83 |
| <i>Prkcb</i>   | protein kinase C, beta                                                              | 1.694  | 2.050  | 0.83 |
| <i>nup62cl</i> | nucleoporin 62 C-terminal like                                                      | 3.255  | 4.009  | 0.81 |
| <i>Clc3</i>    | chloride intracellular channel 3                                                    | 1.819  | 2.243  | 0.81 |
| <i>asphd2</i>  | aspartate beta-hydroxylase domain containing 2                                      | 2.329  | 2.880  | 0.81 |
| <i>Plekhd1</i> | pleckstrin homology domain containing, family D (with coiled-coil domains) member 1 | 1.812  | 2.249  | 0.81 |
| <i>nr4a1</i>   | nuclear receptor subfamily 4, group A, member 1                                     | 3.114  | 3.869  | 0.80 |
| <i>Msh2</i>    | mutS homolog 2                                                                      | 1.612  | 2.030  | 0.79 |
| <i>Cd55</i>    | CD55 molecule, decay accelerating factor for complement (Cromer blood group)        | 1.978  | 2.513  | 0.79 |
| <i>gmn</i>     | geminin, DNA replication inhibitor                                                  | 3.456  | 4.518  | 0.76 |
| <i>Ns5atp9</i> | KIAA0101                                                                            | 1.707  | 2.234  | 0.76 |
| <i>Kif20a</i>  | kinesin family member 20A                                                           | 1.991  | 2.615  | 0.76 |
| <i>cxcl13</i>  | chemokine (C-X-C motif) ligand 13                                                   | 2.773  | 3.655  | 0.76 |
| <i>Pde4d</i>   | phosphodiesterase 4D, cAMP-specific                                                 | 1.838  | 2.435  | 0.75 |
| <i>ephb3</i>   | EPH receptor B3                                                                     | 2.641  | 3.552  | 0.74 |
| <i>Angptl1</i> | angiopoietin-like 1                                                                 | 1.862  | 2.509  | 0.74 |
| <i>osgin2</i>  | oxidative stress induced growth inhibitor family member 2                           | 5.898  | 8.088  | 0.73 |
| <i>E2f8</i>    | E2F transcription factor 8                                                          | 1.500  | 2.062  | 0.73 |
| <i>Cdt1</i>    | chromatin licensing and DNA replication factor 1                                    | 1.569  | 2.196  | 0.71 |
| <i>Isg15</i>   | ISG15 ubiquitin-like modifier                                                       | 1.527  | 2.189  | 0.70 |
| <i>sult1b1</i> | sulfotransferase family, cytosolic, 1B, member 1                                    | 8.839  | 12.683 | 0.70 |
| <i>lhcr</i>    | luteinizing hormone/choriogonadotropin receptor                                     | 27.986 | 41.788 | 0.67 |
| <i>Ednrb</i>   | endothelin receptor type B                                                          | 1.333  | 2.018  | 0.66 |

|                  |                                                                                                   |               |                  |                |
|------------------|---------------------------------------------------------------------------------------------------|---------------|------------------|----------------|
| <i>grem2</i>     | gremlin 2, DAN family BMP antagonist                                                              | 3.198         | 4.890            | 0.65           |
| <i>tnfaip6</i>   | tumor necrosis factor, alpha-induced protein 6                                                    | 30.148        | 46.638           | 0.65           |
| <i>cftr</i>      | cystic fibrosis transmembrane conductance regulator (ATP-binding cassette sub-family C, member 7) | 2.248         | 3.484            | 0.65           |
| <i>plat</i>      | plasminogen activator, tissue                                                                     | 4.737         | 7.353            | 0.64           |
| <i>Dio2</i>      | deiodinase, iodothyronine, type II                                                                | 1.389         | 2.179            | 0.64           |
| <i>pde4b</i>     | phosphodiesterase 4B, cAMP-specific                                                               | 17.981        | 28.364           | 0.63           |
| <i>Snap25</i>    | synaptosomal-associated protein 25Kda                                                             | 1.601         | 2.574            | 0.62           |
| <i>Plk2</i>      | polo-like kinase 2                                                                                | 1.446         | 2.335            | 0.62           |
| <i>Sord</i>      | sorbitol dehydrogenase                                                                            | 1.659         | 2.918            | 0.57           |
| <i>adcyap1</i>   | adenylate cyclase activating polypeptide 1 (pituitary)                                            | 2.964         | 5.229            | 0.57           |
| <i>Car2</i>      | carbonic anhydrase II                                                                             | 1.374         | 2.551            | 0.54           |
| <i>Tmem252</i>   | transmembrane protein 252                                                                         | 1.505         | 2.811            | 0.54           |
| <i>cyp19a1</i>   | cytochrome P450, family 19, subfamily A, polypeptide 1                                            | 29.441        | 59.709           | 0.49           |
| <i>nap1l5</i>    | nucleosome assembly protein 1-like 5                                                              | 8.370         | 17.313           | 0.48           |
| <i>Slc7a11</i>   | solute carrier family 7, member 11                                                                | 1.337         | 2.896            | 0.46           |
| <i>Havcr1</i>    | hepatitis A virus cellular receptor 1                                                             | 0.947         | 2.095            | 0.45           |
| <i>Nr4a3</i>     | nuclear receptor subfamily 4, group A, member 3                                                   | 1.805         | 4.200            | 0.43           |
| <i>Cga</i>       | glycoprotein hormones, alpha polypeptide                                                          | 1.807         | 4.397            | 0.41           |
| <i>Npy1r</i>     | neuropeptide Y receptor Y1                                                                        | 1.973         | 4.826            | 0.41           |
| <i>Pgr</i>       | progesterone receptor                                                                             | 1.745         | 4.295            | 0.41           |
| <i>akr1b8</i>    | aldo-keto reductase family 1, member B10 (aldose reductase)                                       | 3.179         | 7.965            | 0.40           |
| <i>fabp5</i>     | fatty acid binding protein 5 (psoriasis-associated)                                               | 2.571         | 6.452            | 0.40           |
| <i>Rgs1</i>      | regulator of G-protein signaling 1                                                                | 1.335         | 3.413            | 0.39           |
| <i>ptgs2</i>     | prostaglandin-endoperoxide synthase 2 (prostaglandin G/H synthase and cyclooxygenase)             | 12.770        | 35.200           | 0.36           |
| <i>scd</i>       | stearoyl-Coenzyme A desaturase 2                                                                  | 2.132         | 5.995            | 0.36           |
| <i>ereg</i>      | epiregulin                                                                                        | 5.369         | 18.101           | 0.30           |
| <i>gja5</i>      | gap junction protein, alpha 5, 40kDa                                                              | 4.663         | 16.257           | 0.29           |
| <i>areg</i>      | amphiregulin                                                                                      | 3.572         | 13.836           | 0.26           |
| <b>ID</b>        | <b>ENTREZ GENE NAME (Down-regulated Genes)</b>                                                    | <b>C /FSH</b> | <b>C/PKA-CQR</b> | <b>FSH/PKA</b> |
| <i>pamr1</i>     | peptidase domain containing associated with muscle regeneration 1                                 | -49.126       | -3.030           | 0.06           |
| <i>tnfrsf11b</i> | tumor necrosis factor receptor superfamily, member 11b                                            | -65.433       | -5.059           | 0.08           |
| <i>fam65b</i>    | family with sequence similarity 65, member B                                                      | -27.998       | -3.010           | 0.11           |
| <i>anpep</i>     | alanyl (membrane) aminopeptidase                                                                  | -20.897       | -2.373           | 0.11           |
| <i>rcan2</i>     | regulator of calcineurin 2                                                                        | -10.057       | -1.242           | 0.12           |
| <i>adamts5</i>   | ADAM metalloproteinase with thrombospondin type 1 motif, 5                                        | -17.976       | -2.284           | 0.13           |
| <i>agtr2</i>     | angiotensin II receptor, type 2                                                                   | -32.295       | -4.116           | 0.13           |
| <i>aspn</i>      | asporin                                                                                           | -21.456       | -2.862           | 0.13           |
| <i>arhgap6</i>   | Rho GTPase activating protein 6                                                                   | -14.076       | -2.005           | 0.14           |
| <i>lox</i>       | lysyl oxidase                                                                                     | -12.061       | -1.825           | 0.15           |
| <i>pdlim3</i>    | PDZ and LIM domain 3                                                                              | -21.345       | -3.725           | 0.17           |
| <i>agtr1a</i>    | angiotensin II receptor, type 1                                                                   | -21.200       | -4.450           | 0.21           |
| <i>lmcd1</i>     | LIM and cysteine-rich domains 1                                                                   | -19.922       | -4.417           | 0.22           |
| <i>cdh11</i>     | cadherin 11, type 2, OB-cadherin (osteoblast)                                                     | -19.393       | -4.352           | 0.22           |
| <i>nov</i>       | nephroblastoma overexpressed                                                                      | -7.104        | -1.633           | 0.23           |
| <i>mfap5</i>     | microfibrillar associated protein 5                                                               | -9.731        | -2.253           | 0.23           |
| <i>zcchc18</i>   | zinc finger, CCHC domain containing 18                                                            | -6.376        | -1.528           | 0.24           |
| <i>fn1</i>       | fibronectin 1                                                                                     | -10.737       | -2.597           | 0.24           |
| <i>p4ha3</i>     | prolyl 4-hydroxylase, alpha polypeptide III                                                       | -20.228       | -4.969           | 0.25           |
| <i>cdo1</i>      | cysteine dioxygenase type 1                                                                       | -12.258       | -3.078           | 0.25           |
| <i>tagln</i>     | transgelin                                                                                        | -15.064       | -3.866           | 0.26           |
| <i>ifitm1</i>    | interferon induced transmembrane protein 1                                                        | -8.250        | -2.119           | 0.26           |
| <i>sybu</i>      | syntabulin (syntaxin-interacting)                                                                 | -5.469        | -1.415           | 0.26           |
| <i>cyp26b1</i>   | cytochrome P450, family 26, subfamily B, polypeptide 1                                            | -6.693        | -1.769           | 0.26           |
| <i>klf5</i>      | Kruppel-like factor 5 (intestinal)                                                                | -15.351       | -4.086           | 0.27           |

|                 |                                                              |         |        |      |
|-----------------|--------------------------------------------------------------|---------|--------|------|
| <i>pdk4</i>     | pyruvate dehydrogenase kinase, isozyme 4                     | -10.918 | -2.924 | 0.27 |
| <i>col11a1</i>  | collagen, type XI, alpha 1                                   | -5.845  | -1.588 | 0.27 |
| <i>pcdh19</i>   | protocadherin 19                                             | -3.469  | -0.973 | 0.28 |
| <i>bdnf</i>     | brain-derived neurotrophic factor                            | -13.213 | -3.779 | 0.29 |
| <i>dkk3</i>     | dickkopf WNT signaling pathway inhibitor 3                   | -6.044  | -1.739 | 0.29 |
| <i>rassf4</i>   | Ras association (RalGDS/AF-6) domain family member 4         | -5.787  | -1.725 | 0.30 |
| <i>lrrfip1</i>  | leucine rich repeat (in FLII) interacting protein 1          | -6.875  | -2.067 | 0.30 |
| <i>nr0b1</i>    | nuclear receptor subfamily 0, group B, member 1              | -5.932  | -1.829 | 0.31 |
| <i>xdh</i>      | xanthine dehydrogenase                                       | -6.348  | -2.008 | 0.32 |
| <i>scn4b</i>    | sodium channel, voltage-gated, type IV, beta subunit         | -2.607  | -0.848 | 0.33 |
| <i>nxn12</i>    | nucleoredoxin-like 2                                         | -3.471  | -1.137 | 0.33 |
| <i>ptges</i>    | prostaglandin E synthase                                     | -2.902  | -0.957 | 0.33 |
| <i>rapgef5</i>  | Rap guanine nucleotide exchange factor (GEF) 5               | -4.450  | -1.475 | 0.33 |
| <i>hrct1</i>    | histidine rich carboxyl terminus 1                           | -5.601  | -1.873 | 0.33 |
| <i>cyr61</i>    | cysteine-rich, angiogenic inducer, 61                        | -10.668 | -3.617 | 0.34 |
| <i>spon1</i>    | spondin 1, extracellular matrix protein                      | -2.552  | -0.877 | 0.34 |
| <i>sorbs1</i>   | sorbin and SH3 domain containing 1                           | -10.278 | -3.581 | 0.35 |
| <i>popdc2</i>   | popeye domain containing 2                                   | -7.931  | -2.778 | 0.35 |
| <i>kcnk2</i>    | potassium channel, subfamily K, member 2                     | -4.033  | -1.429 | 0.35 |
| <i>lims2</i>    | LIM and senescent cell antigen-like domains 2                | -18.396 | -6.532 | 0.36 |
| <i>sytl2</i>    | synaptotagmin-like 2                                         | -7.234  | -2.605 | 0.36 |
| <i>fry</i>      | furry homolog (Drosophila)                                   | -3.380  | -1.221 | 0.36 |
| <i>ehd4</i>     | EH-domain containing 4                                       | -6.173  | -2.251 | 0.36 |
| <i>atoh8</i>    | atonal homolog 8 (Drosophila)                                | -4.205  | -1.541 | 0.37 |
| <i>lhfp</i>     | lipoma HMGIC fusion partner                                  | -6.795  | -2.493 | 0.37 |
| <i>irx3</i>     | iroquois homeobox 3                                          | -4.883  | -1.804 | 0.37 |
| <i>cidea</i>    | cell death-inducing DFFA-like effector a                     | -4.669  | -1.728 | 0.37 |
| <i>mcam</i>     | melanoma cell adhesion molecule                              | -5.335  | -1.980 | 0.37 |
| <i>fgf18</i>    | fibroblast growth factor 18                                  | -5.195  | -1.952 | 0.38 |
| <i>filip1l</i>  | filamin A interacting protein 1-like                         | -4.738  | -1.809 | 0.38 |
| <i>cav2</i>     | caveolin 2                                                   | -10.074 | -3.858 | 0.38 |
| <i>fam181b</i>  | family with sequence similarity 181, member B                | -3.585  | -1.373 | 0.38 |
| <i>ydjc</i>     | YdjC homolog (bacterial)                                     | -6.100  | -2.340 | 0.38 |
| <i>tex14</i>    | testis expressed 14                                          | -5.622  | -2.161 | 0.38 |
| <i>coch</i>     | cochlin                                                      | -3.618  | -1.394 | 0.39 |
| <i>limch1</i>   | LIM and calponin homology domains 1                          | -2.766  | -1.067 | 0.39 |
| <i>tgfb2</i>    | transforming growth factor, beta 2                           | -7.033  | -2.714 | 0.39 |
| <i>serping1</i> | serpin peptidase inhibitor, clade G (C1 inhibitor), member 1 | -6.239  | -2.418 | 0.39 |
| <i>nid1</i>     | nidogen 1                                                    | -5.972  | -2.331 | 0.39 |
| <i>dcn</i>      | decorin                                                      | -4.563  | -1.790 | 0.39 |
| <i>ptplad2</i>  | protein tyrosine phosphatase-like A domain containing 2      | -4.295  | -1.688 | 0.39 |
| <i>meox2</i>    | mesenchyme homeobox 2                                        | -12.977 | -5.140 | 0.40 |
| <i>cdc42ep3</i> | CDC42 effector protein (Rho GTPase binding) 3                | -8.467  | -3.366 | 0.40 |
| <i>spp1</i>     | secreted phosphoprotein 1                                    | -5.676  | -2.270 | 0.40 |
| <i>mgp</i>      | matrix Gla protein                                           | -2.850  | -1.143 | 0.40 |
| <i>pgm2l1</i>   | phosphoglucomutase 2-like 1                                  | -4.461  | -1.795 | 0.40 |
| <i>ptger3</i>   | prostaglandin E receptor 3 (subtype EP3)                     | -5.398  | -2.175 | 0.40 |
| <i>angpt2</i>   | angiopoietin 2                                               | -4.724  | -1.928 | 0.41 |
| <i>rnf182</i>   | ring finger protein 182                                      | -4.836  | -2.007 | 0.42 |
| <i>hook1</i>    | hook microtubule-tethering protein 1                         | -3.315  | -1.377 | 0.42 |
| <i>cav1</i>     | caveolin 1, caveolae protein, 22kDa                          | -6.089  | -2.559 | 0.42 |
| <i>cbln1</i>    | cerebellin 1 precursor                                       | -2.534  | -1.072 | 0.42 |
| <i>cald1</i>    | caldesmon 1                                                  | -9.697  | -4.145 | 0.43 |
| <i>htra2</i>    | HtrA serine peptidase 2                                      | -2.502  | -1.075 | 0.43 |
| <i>crim1</i>    | cysteine rich transmembrane BMP regulator 1 (chordin-like)   | -4.597  | -1.986 | 0.43 |

|                   |                                                                                                        |        |        |      |
|-------------------|--------------------------------------------------------------------------------------------------------|--------|--------|------|
| <i>slc16a7</i>    | solute carrier family 16 (monocarboxylate transporter), member 7                                       | -4.587 | -1.990 | 0.43 |
| <i>arnt2</i>      | aryl-hydrocarbon receptor nuclear translocator 2                                                       | -5.966 | -2.657 | 0.45 |
| <i>lpar1</i>      | lysophosphatidic acid receptor 1                                                                       | -6.300 | -2.811 | 0.45 |
| <i>otud1</i>      | OTU deubiquitinase 1                                                                                   | -5.878 | -2.627 | 0.45 |
| <i>clu</i>        | clusterin                                                                                              | -3.626 | -1.622 | 0.45 |
| <i>akap12</i>     | A kinase (PRKA) anchor protein 12                                                                      | -7.955 | -3.566 | 0.45 |
| <i>rgma</i>       | repulsive guidance molecule family member a                                                            | -3.307 | -1.483 | 0.45 |
| <i>tspan8</i>     | tetraspanin 8                                                                                          | -6.199 | -2.781 | 0.45 |
| <i>apcdd1</i>     | adenomatosis polyposis coli down-regulated 1                                                           | -3.312 | -1.488 | 0.45 |
| <i>adm</i>        | adrenomedullin                                                                                         | -8.220 | -3.713 | 0.45 |
| <i>tdrd7</i>      | tudor domain containing 7                                                                              | -4.721 | -2.140 | 0.45 |
| <i>ryr2</i>       | ryanodine receptor 2 (cardiac)                                                                         | -3.291 | -1.497 | 0.45 |
| <i>tfcp2l1</i>    | transcription factor CP2-like 1                                                                        | -3.378 | -1.541 | 0.46 |
| <i>kif23</i>      | kinesin family member 23                                                                               | -2.322 | -1.077 | 0.46 |
| <i>runx1t1</i>    | runt-related transcription factor 1; translocated to, 1 (cyclin D-related)                             | -8.384 | -3.889 | 0.46 |
| <i>ets1</i>       | v-ets avian erythroblastosis virus E26 oncogene homolog 1                                              | -6.238 | -2.916 | 0.47 |
| <i>serpinf1</i>   | serpin peptidase inhibitor, clade F (alpha-2 antiplasmin, pigment epithelium derived factor), member 1 | -2.396 | -1.121 | 0.47 |
| <i>ppp1r3c</i>    | protein phosphatase 1, regulatory subunit 3C                                                           | -4.658 | -2.198 | 0.47 |
| <i>pik3ip1</i>    | phosphoinositide-3-kinase interacting protein 1                                                        | -3.485 | -1.647 | 0.47 |
| <i>sqrdl</i>      | sulfide quinone reductase-like (yeast)                                                                 | -4.214 | -1.992 | 0.47 |
| <i>kcnab1</i>     | potassium voltage-gated channel, shaker-related subfamily, beta member 1                               | -2.198 | -1.046 | 0.48 |
| <i>procr</i>      | protein C receptor, endothelial                                                                        | -2.237 | -1.067 | 0.48 |
| <i>prss23</i>     | protease, serine, 23                                                                                   | -2.927 | -1.398 | 0.48 |
| <i>pawr</i>       | PRKC, apoptosis, WT1, regulator                                                                        | -3.825 | -1.827 | 0.48 |
| LOC100363275      | G protein-coupled receptor 124                                                                         | -3.091 | -1.477 | 0.48 |
| <i>sspn</i>       | sarcospan                                                                                              | -3.604 | -1.749 | 0.49 |
| <i>ccdc3</i>      | coiled-coil domain containing 3                                                                        | -3.125 | -1.519 | 0.49 |
| <i>me3</i>        | malic enzyme 3, NADP(+)-dependent, mitochondrial                                                       | -3.184 | -1.550 | 0.49 |
| <i>fam84a</i>     | family with sequence similarity 84, member A                                                           | -4.677 | -2.277 | 0.49 |
| <i>ppp1r14a</i>   | protein phosphatase 1, regulatory (inhibitor) subunit 14A                                              | -2.903 | -1.422 | 0.49 |
| <i>mid1</i>       | midline 1 (Opitz/BBB syndrome)                                                                         | -4.857 | -2.393 | 0.49 |
| <i>got1l1</i>     | glutamic-oxaloacetic transaminase 1-like 1                                                             | -3.667 | -1.820 | 0.50 |
| <i>dmd</i>        | dystrophin                                                                                             | -2.047 | -1.026 | 0.50 |
| <i>kcnk6</i>      | potassium channel, subfamily K, member 6                                                               | -4.185 | -2.121 | 0.51 |
| <i>hbq1b</i>      | hemoglobin, theta 1                                                                                    | -2.573 | -1.305 | 0.51 |
| <i>diaph3</i>     | diaphanous-related formin 3                                                                            | -2.639 | -1.340 | 0.51 |
| <i>wwc2</i>       | WW and C2 domain containing 2                                                                          | -2.573 | -1.309 | 0.51 |
| <i>mcart1l</i>    | solute carrier family 25, member 53                                                                    | -2.260 | -1.157 | 0.51 |
| RGD1561724        | similar to mKIAA0716 protein                                                                           | -3.249 | -1.665 | 0.51 |
| <i>cys1</i>       | cystin 1                                                                                               | -3.078 | -1.592 | 0.52 |
| LOC685067         | guanylate binding protein 7                                                                            | -2.432 | -1.269 | 0.52 |
| <i>cdc42ep2</i>   | CDC42 effector protein (Rho GTPase binding) 2                                                          | -3.087 | -1.621 | 0.53 |
| <i>sik2</i>       | salt-inducible kinase 2                                                                                | -2.713 | -1.425 | 0.53 |
| <i>vwa1</i>       | von Willebrand factor A domain containing 1                                                            | -3.322 | -1.747 | 0.53 |
| <i>cd83</i>       | CD83 molecule                                                                                          | -4.058 | -2.136 | 0.53 |
| <i>slco3a1</i>    | solute carrier organic anion transporter family, member 3A1                                            | -2.402 | -1.266 | 0.53 |
| <i>omd</i>        | osteomodulin                                                                                           | -2.276 | -1.212 | 0.53 |
| <i>myo1d</i>      | myosin ID                                                                                              | -3.516 | -1.874 | 0.53 |
| <i>mboat1</i>     | membrane bound O-acyltransferase domain containing 1                                                   | -3.174 | -1.695 | 0.53 |
| <i>fam46a</i>     | family with sequence similarity 46, member A                                                           | -3.008 | -1.613 | 0.54 |
| <i>calhm2</i>     | calcium homeostasis modulator 2                                                                        | -3.571 | -1.917 | 0.54 |
| <i>rbpms</i>      | RNA binding protein with multiple splicing                                                             | -3.166 | -1.705 | 0.54 |
| <i>ccdc109b</i>   | coiled-coil domain containing 109B                                                                     | -2.324 | -1.254 | 0.54 |
| <i>cspg4</i>      | chondroitin sulfate proteoglycan 4                                                                     | -2.224 | -1.201 | 0.54 |
| <i>st6galnac3</i> | ST6 (alpha-N-acetyl-neuraminy-2,3-beta-galactosyl-1,3)-N-acetylgalactosaminide alpha-2,6-              | -3.612 | -1.952 | 0.54 |

|                 |                                                                                    |        |        |      |
|-----------------|------------------------------------------------------------------------------------|--------|--------|------|
|                 | sialyltransferase 3                                                                |        |        |      |
| <i>col4a4</i>   | collagen, type IV, alpha 4                                                         | -4.166 | -2.262 | 0.54 |
| <i>ccdc141</i>  | coiled-coil domain containing 141                                                  | -3.960 | -2.152 | 0.54 |
| <i>tnc</i>      | tenascin C                                                                         | -4.489 | -2.440 | 0.54 |
| <i>rhobtb1</i>  | Rho-related BTB domain containing 1                                                | -3.081 | -1.679 | 0.54 |
| <i>lipa</i>     | lipase A, lysosomal acid, cholesterol esterase                                     | -2.505 | -1.367 | 0.55 |
| <i>setdb2</i>   | SET domain, bifurcated 2                                                           | -2.999 | -1.637 | 0.55 |
| <i>sipa1l2</i>  | signal-induced proliferation-associated 1 like 2                                   | -2.509 | -1.377 | 0.55 |
| <i>kcnma1</i>   | potassium large conductance calcium-activated channel, subfamily M, alpha member 1 | -2.723 | -1.496 | 0.55 |
| <i>col14a1</i>  | collagen, type XIV, alpha 1                                                        | -2.995 | -1.646 | 0.55 |
| <i>wipf1</i>    | WAS/WASL interacting protein family, member 1                                      | -3.311 | -1.826 | 0.55 |
| <i>ankrd28</i>  | ankyrin repeat domain 28                                                           | -2.874 | -1.586 | 0.55 |
| <i>tgfb1i1</i>  | transforming growth factor beta 1 induced transcript 1                             | -3.733 | -2.065 | 0.55 |
| <i>b3gnt5</i>   | UDP-GlcNAc:betaGal beta-1,3-N-acetylglucosaminyltransferase 5                      | -4.080 | -2.259 | 0.55 |
| <i>cxadr</i>    | coxsackie virus and adenovirus receptor                                            | -2.276 | -1.262 | 0.55 |
| <i>metrnl</i>   | meteorin, glial cell differentiation regulator-like                                | -2.594 | -1.440 | 0.56 |
| LOC100909788    | uncharacterized LOC100909788                                                       | -2.344 | -1.303 | 0.56 |
| <i>lpar6</i>    | lysophosphatidic acid receptor 6                                                   | -3.551 | -1.981 | 0.56 |
| <i>nrg1</i>     | neuregulin 1                                                                       | -3.469 | -1.943 | 0.56 |
| <i>rimklb</i>   | ribosomal modification protein rimK-like family member B                           | -3.498 | -1.962 | 0.56 |
| <i>pcdh20</i>   | protocadherin 20                                                                   | -3.644 | -2.048 | 0.56 |
| RGD1562284      | glutaminyl-peptide cyclotransferase                                                | -2.841 | -1.598 | 0.56 |
| <i>dab2</i>     | Dab, mitogen-responsive phosphoprotein, homolog 2 (Drosophila)                     | -2.880 | -1.625 | 0.56 |
| <i>zfp608</i>   | zinc finger protein 608                                                            | -4.445 | -2.522 | 0.57 |
| LOC361016       | chromosome 3 open reading frame 67                                                 | -2.404 | -1.364 | 0.57 |
| RGD1309651      | chromosome 16 open reading frame 74                                                | -2.015 | -1.145 | 0.57 |
| <i>gcom1</i>    | myocardial zonula adherens protein                                                 | -4.054 | -2.310 | 0.57 |
| <i>col3a1</i>   | collagen, type III, alpha 1                                                        | -3.681 | -2.099 | 0.57 |
| <i>lgals8</i>   | lectin, galactoside-binding, soluble, 8                                            | -3.395 | -1.940 | 0.57 |
| <i>esyt1</i>    | extended synaptotagmin-like protein 1                                              | -2.804 | -1.604 | 0.57 |
| <i>fads3</i>    | fatty acid desaturase 3                                                            | -3.330 | -1.908 | 0.57 |
| <i>inadl</i>    | InaD-like (Drosophila)                                                             | -3.403 | -1.952 | 0.57 |
| <i>tmem140</i>  | transmembrane protein 140                                                          | -2.960 | -1.699 | 0.57 |
| <i>fabp3</i>    | fatty acid binding protein 3, muscle and heart (mammary-derived growth inhibitor)  | -2.521 | -1.448 | 0.57 |
| <i>hs6st1</i>   | heparan sulfate 6-O-sulfotransferase 1                                             | -2.425 | -1.401 | 0.58 |
| <i>tpm1</i>     | tropomyosin 1, alpha                                                               | -4.671 | -2.700 | 0.58 |
| <i>akap5</i>    | A kinase (PRKA) anchor protein 5                                                   | -5.740 | -3.319 | 0.58 |
| <i>faxdc2</i>   | fatty acid hydroxylase domain containing 2                                         | -2.376 | -1.375 | 0.58 |
| <i>ptprd</i>    | protein tyrosine phosphatase, receptor type, D                                     | -2.275 | -1.318 | 0.58 |
| <i>tubb2b</i>   | tubulin, beta 2B class IIb                                                         | -3.081 | -1.787 | 0.58 |
| <i>itpr1</i>    | inositol 1,4,5-trisphosphate receptor, type 1                                      | -2.330 | -1.352 | 0.58 |
| LOC100910319    | uncharacterized LOC100910319                                                       | -4.831 | -2.804 | 0.58 |
| <i>rasl11b</i>  | RAS-like, family 11, member B                                                      | -2.036 | -1.182 | 0.58 |
| <i>ptprk</i>    | protein tyrosine phosphatase, receptor type, K                                     | -2.245 | -1.313 | 0.58 |
| <i>klhdc8b</i>  | kelch domain containing 8B                                                         | -2.798 | -1.637 | 0.59 |
| <i>rbms3</i>    | RNA binding motif, single stranded interacting protein 3                           | -2.890 | -1.691 | 0.59 |
| <i>six4</i>     | SIX homeobox 4                                                                     | -4.106 | -2.408 | 0.59 |
| <i>stc1</i>     | stanniocalcin 1                                                                    | -6.415 | -3.765 | 0.59 |
| <i>cd9</i>      | CD9 molecule                                                                       | -2.155 | -1.267 | 0.59 |
| <i>fgl2</i>     | fibrinogen-like 2                                                                  | -2.920 | -1.717 | 0.59 |
| <i>plxdc2</i>   | plexin domain containing 2                                                         | -2.909 | -1.711 | 0.59 |
| <i>foxp2</i>    | forkhead box P2                                                                    | -3.065 | -1.805 | 0.59 |
| <i>arhgef25</i> | Rho guanine nucleotide exchange factor (GEF) 25                                    | -3.027 | -1.784 | 0.59 |
| <i>pkp2</i>     | plakophilin 2                                                                      | -2.840 | -1.677 | 0.59 |
| <i>fam101b</i>  | family with sequence similarity 101, member B                                      | -2.640 | -1.561 | 0.59 |
| <i>slc24a3</i>  | solute carrier family 24 (sodium/potassium/calcium exchanger), member 3            | -2.815 | -1.669 | 0.59 |

|                  |                                                                        |         |        |      |
|------------------|------------------------------------------------------------------------|---------|--------|------|
| <i>slc31a2</i>   | solute carrier family 31 (copper transporter), member 2                | -2.808  | -1.669 | 0.59 |
| LOC689770        | C-type lectin domain family 2, member D                                | -3.265  | -1.943 | 0.60 |
| <i>gpm6a</i>     | glycoprotein M6A                                                       | -2.061  | -1.229 | 0.60 |
| <i>rell1</i>     | RELT-like 1                                                            | -2.236  | -1.335 | 0.60 |
| <i>ppap2b</i>    | phosphatidic acid phosphatase type 2B                                  | -3.764  | -2.248 | 0.60 |
| <i>car3</i>      | carbonic anhydrase III, muscle specific                                | -10.956 | -6.545 | 0.60 |
| <i>bmp4</i>      | bone morphogenetic protein 4                                           | -5.959  | -3.562 | 0.60 |
| <i>ppp2r1b</i>   | protein phosphatase 2, regulatory subunit A, beta                      | -2.440  | -1.462 | 0.60 |
| <i>trim47</i>    | tripartite motif containing 47                                         | -2.478  | -1.490 | 0.60 |
| <i>fhl2</i>      | four and a half LIM domains 2                                          | -3.512  | -2.114 | 0.60 |
| <i>phex</i>      | phosphate regulating endopeptidase homolog, X-linked                   | -2.726  | -1.642 | 0.60 |
| <i>s1pr2</i>     | sphingosine-1-phosphate receptor 2                                     | -2.887  | -1.741 | 0.60 |
| LOC100911506     | uncharacterized LOC100911506                                           | -2.612  | -1.578 | 0.60 |
| <i>arhgef26</i>  | Rho guanine nucleotide exchange factor (GEF) 26                        | -3.018  | -1.825 | 0.60 |
| <i>spink8</i>    | serine peptidase inhibitor, Kazal type 8 (putative)                    | -11.814 | -7.174 | 0.61 |
| <i>pam</i>       | peptidylglycine alpha-amidating monooxygenase                          | -2.200  | -1.339 | 0.61 |
| <i>reln</i>      | reelin                                                                 | -2.272  | -1.383 | 0.61 |
| <i>cebpd</i>     | CCAAT/enhancer binding protein (C/EBP), delta                          | -4.080  | -2.486 | 0.61 |
| <i>slc2a13</i>   | solute carrier family 2 (facilitated glucose transporter), member 13   | -2.445  | -1.497 | 0.61 |
| <i>cobl</i>      | cordon-bleu WH2 repeat protein                                         | -2.554  | -1.565 | 0.61 |
| <i>jdp2</i>      | Jun dimerization protein 2                                             | -2.151  | -1.326 | 0.62 |
| <i>ddah1</i>     | dimethylarginine dimethylaminohydrolase 1                              | -2.323  | -1.435 | 0.62 |
| <i>tmeff1</i>    | transmembrane protein with EGF-like and two follistatin-like domains 1 | -3.238  | -2.004 | 0.62 |
| <i>sh3bp4</i>    | SH3-domain binding protein 4                                           | -2.541  | -1.574 | 0.62 |
| LOC100912462     | uncharacterized LOC100912462                                           | -3.001  | -1.859 | 0.62 |
| <i>amotl2</i>    | angiomin like 2                                                        | -2.691  | -1.668 | 0.62 |
| <i>pip4k2a</i>   | phosphatidylinositol-5-phosphate 4-kinase, type II, alpha              | -2.657  | -1.647 | 0.62 |
| <i>cpq</i>       | carboxypeptidase Q                                                     | -2.753  | -1.707 | 0.62 |
| <i>scn1a</i>     | sodium channel, voltage-gated, type I, alpha subunit                   | -2.508  | -1.556 | 0.62 |
| <i>rhoj</i>      | ras homolog family member J                                            | -2.102  | -1.307 | 0.62 |
| <i>ramp1</i>     | receptor (G protein-coupled) activity modifying protein 1              | -2.386  | -1.484 | 0.62 |
| LOC684173        | TNF receptor-associated factor 5                                       | -3.430  | -2.137 | 0.62 |
| <i>gca</i>       | grancalcin, EF-hand calcium binding protein                            | -2.857  | -1.782 | 0.62 |
| <i>cd200</i>     | CD200 molecule                                                         | -2.867  | -1.791 | 0.62 |
| LOC100912373     | uncharacterized LOC100912373                                           | -3.338  | -2.096 | 0.63 |
| <i>tmcc3</i>     | transmembrane and coiled-coil domain family 3                          | -3.187  | -2.004 | 0.63 |
| <i>cst3</i>      | cystatin C                                                             | -2.604  | -1.638 | 0.63 |
| <i>bche</i>      | butyrylcholinesterase                                                  | -2.847  | -1.793 | 0.63 |
| <i>maff</i>      | v-maf avian musculoaponeurotic fibrosarcoma oncogene homolog F         | -2.823  | -1.780 | 0.63 |
| <i>stxbp6</i>    | syntaxin binding protein 6 (amisyn)                                    | -4.123  | -2.604 | 0.63 |
| <i>nupr1</i>     | nuclear protein, transcriptional regulator, 1                          | -2.145  | -1.356 | 0.63 |
| <i>col4a5</i>    | collagen, type IV, alpha 5                                             | -2.521  | -1.594 | 0.63 |
| <i>ppic</i>      | peptidylprolyl isomerase C (cyclophilin C)                             | -3.238  | -2.057 | 0.64 |
| <i>sowahc</i>    | sosondawah ankyrin repeat domain family member C                       | -2.419  | -1.537 | 0.64 |
| <i>ptp4a3</i>    | protein tyrosine phosphatase type IVA, member 3                        | -3.758  | -2.400 | 0.64 |
| LOC100912470     | uncharacterized LOC100912470                                           | -2.405  | -1.538 | 0.64 |
| LOC684871        | chromosome 8 open reading frame 4                                      | -2.231  | -1.428 | 0.64 |
| <i>wwc1</i>      | WW and C2 domain containing 1                                          | -2.320  | -1.485 | 0.64 |
| <i>rgs7bp</i>    | regulator of G-protein signaling 7 binding protein                     | -5.807  | -3.719 | 0.64 |
| <i>hspb1</i>     | heat shock 27kDa protein 1                                             | -3.293  | -2.110 | 0.64 |
| <i>slc8a1</i>    | solute carrier family 8 (sodium/calcium exchanger), member 1           | -3.022  | -1.939 | 0.64 |
| <i>serpinb6b</i> | serine (or cysteine) peptidase inhibitor, clade B, member 6b           | -3.048  | -1.958 | 0.64 |
| <i>gls</i>       | glutaminase                                                            | -2.559  | -1.644 | 0.64 |
| <i>zfp2</i>      | zinc finger protein, FOG family member 2                               | -2.345  | -1.508 | 0.64 |
| <i>bmp2</i>      | bone morphogenetic protein 2                                           | -2.051  | -1.320 | 0.64 |
| <i>sclt1</i>     | sodium channel and clathrin linker 1                                   | -2.625  | -1.691 | 0.64 |



|                  |                                                                                                     |        |        |      |
|------------------|-----------------------------------------------------------------------------------------------------|--------|--------|------|
| <i>csrp1</i>     | cysteine and glycine-rich protein 1                                                                 | -3.724 | -2.399 | 0.64 |
| <i>serpinb6</i>  | serpin peptidase inhibitor, clade B (ovalbumin), member 6                                           | -2.873 | -1.852 | 0.64 |
| <i>mal2</i>      | mal, T-cell differentiation protein 2 (gene/pseudogene)                                             | -3.556 | -2.293 | 0.64 |
| <i>fam159b</i>   | family with sequence similarity 159, member B                                                       | -2.276 | -1.472 | 0.65 |
| <i>etl4</i>      | KIAA1217                                                                                            | -2.751 | -1.780 | 0.65 |
| <i>itga6</i>     | integrin, alpha 6                                                                                   | -2.115 | -1.369 | 0.65 |
| <i>cttnbp2</i>   | cortactin binding protein 2                                                                         | -2.067 | -1.340 | 0.65 |
| <i>phlpp1</i>    | PH domain and leucine rich repeat protein phosphatase 1                                             | -2.216 | -1.440 | 0.65 |
| <i>meis1</i>     | Meis homeobox 1                                                                                     | -2.277 | -1.484 | 0.65 |
| <i>pkig</i>      | protein kinase (cAMP-dependent, catalytic) inhibitor gamma                                          | -2.433 | -1.586 | 0.65 |
| <i>rab11fip1</i> | RAB11 family interacting protein 1 (class I)                                                        | -2.568 | -1.676 | 0.65 |
| <i>dsp</i>       | desmoplakin                                                                                         | -2.749 | -1.795 | 0.65 |
| <i>fam124a</i>   | family with sequence similarity 124A                                                                | -2.392 | -1.562 | 0.65 |
| <i>hdac5</i>     | histone deacetylase 5                                                                               | -3.595 | -2.354 | 0.65 |
| <i>angpt1</i>    | angiopoietin 1                                                                                      | -4.010 | -2.629 | 0.66 |
| <i>hbegf</i>     | heparin-binding EGF-like growth factor                                                              | -6.384 | -4.191 | 0.66 |
| <i>slc43a1</i>   | solute carrier family 43 (amino acid system L transporter), member 1                                | -2.213 | -1.456 | 0.66 |
| <i>mitf</i>      | microphthalmia-associated transcription factor                                                      | -3.143 | -2.069 | 0.66 |
| <i>akt3</i>      | v-akt murine thymoma viral oncogene homolog 3                                                       | -2.311 | -1.525 | 0.66 |
| <i>gadd45b</i>   | growth arrest and DNA-damage-inducible, beta                                                        | -5.789 | -3.826 | 0.66 |
| <i>foxo1</i>     | forkhead box O1                                                                                     | -2.133 | -1.412 | 0.66 |
| <i>ank2</i>      | ankyrin 2, neuronal                                                                                 | -2.895 | -1.922 | 0.66 |
| <i>il15</i>      | interleukin 15                                                                                      | -2.082 | -1.383 | 0.66 |
| <i>samd11</i>    | sterile alpha motif domain containing 11                                                            | -2.071 | -1.377 | 0.66 |
| <i>tslp</i>      | thymic stromal lymphopoietin                                                                        | -3.707 | -2.468 | 0.67 |
| <i>tbc1d23</i>   | TBC1 domain family, member 23                                                                       | -2.902 | -1.934 | 0.67 |
| <i>tspan2</i>    | tetraspanin 2                                                                                       | -4.651 | -3.107 | 0.67 |
| <i>cnrip1</i>    | cannabinoid receptor interacting protein 1                                                          | -2.140 | -1.432 | 0.67 |
| <i>fam20c</i>    | family with sequence similarity 20, member C                                                        | -2.052 | -1.377 | 0.67 |
| <i>perp</i>      | PERP, TP53 apoptosis effector                                                                       | -2.421 | -1.628 | 0.67 |
| <i>col5a2</i>    | collagen, type V, alpha 2                                                                           | -2.490 | -1.675 | 0.67 |
| <i>b3galnt1</i>  | beta-1,3-N-acetylgalactosaminyltransferase 1 (globoside blood group)                                | -2.625 | -1.766 | 0.67 |
| <i>pcbd1</i>     | pterin-4 alpha-carbinolamine dehydratase/dimerization cofactor of hepatocyte nuclear factor 1 alpha | -2.211 | -1.488 | 0.67 |
| <i>ppp1r1a</i>   | protein phosphatase 1, regulatory (inhibitor) subunit 1A                                            | -2.185 | -1.472 | 0.67 |
| <i>klf6</i>      | Kruppel-like factor 6                                                                               | -3.565 | -2.403 | 0.67 |
| <i>irs1</i>      | insulin receptor substrate 1                                                                        | -2.468 | -1.668 | 0.68 |
| <i>rnf180</i>    | ring finger protein 180                                                                             | -2.599 | -1.763 | 0.68 |
| <i>magee1</i>    | melanoma antigen family E, 1                                                                        | -2.265 | -1.537 | 0.68 |
| <i>actn1</i>     | actinin, alpha 1                                                                                    | -3.247 | -2.208 | 0.68 |
| <i>micd1</i>     | microtubule associated monooxygenase, calponin and LIM domain containing 1                          | -2.866 | -1.958 | 0.68 |
| <i>EIF4E3</i>    | eukaryotic translation initiation factor 4E family member 3                                         | -2.980 | -2.037 | 0.68 |
| <i>dock5</i>     | dedicator of cytokinesis 5                                                                          | -2.867 | -1.971 | 0.69 |
| <i>foxp1</i>     | forkhead box P1                                                                                     | -2.812 | -1.935 | 0.69 |
| <i>arx</i>       | aristaless related homeobox                                                                         | -3.520 | -2.423 | 0.69 |
| <i>tmem136</i>   | transmembrane protein 136                                                                           | -2.036 | -1.403 | 0.69 |
| <i>dock11</i>    | dedicator of cytokinesis 11                                                                         | -2.860 | -1.971 | 0.69 |
| <i>ccdc80</i>    | coiled-coil domain containing 80                                                                    | -2.519 | -1.736 | 0.69 |
| <i>flnb</i>      | filamin B, beta                                                                                     | -2.413 | -1.664 | 0.69 |
| <i>pea15</i>     | phosphoprotein enriched in astrocytes 15                                                            | -2.064 | -1.425 | 0.69 |
| <i>morc4</i>     | MORC family CW-type zinc finger 4                                                                   | -2.312 | -1.598 | 0.69 |
| <i>mterfd3</i>   | MTERF domain containing 3                                                                           | -2.400 | -1.664 | 0.69 |
| <i>ajuba</i>     | ajuba LIM protein                                                                                   | -2.180 | -1.513 | 0.69 |
| <i>rab30</i>     | RAB30, member RAS oncogene family                                                                   | -2.984 | -2.075 | 0.70 |
| <i>TCF7L2</i>    | transcription factor 7-like 2 (T-cell specific, HMG-box)                                            | -2.176 | -1.515 | 0.70 |
| <i>cpne8</i>     | copine VIII                                                                                         | -2.411 | -1.682 | 0.70 |

|                 |                                                                                         |        |        |      |
|-----------------|-----------------------------------------------------------------------------------------|--------|--------|------|
| <i>cntrl</i>    | centriolin                                                                              | -2.136 | -1.491 | 0.70 |
| <i>svil</i>     | supervillin                                                                             | -2.048 | -1.431 | 0.70 |
| <i>spats2l</i>  | spermatogenesis associated, serine-rich 2-like                                          | -3.854 | -2.694 | 0.70 |
| LOC100909928    | uncharacterized LOC100909928                                                            | -2.322 | -1.625 | 0.70 |
| <i>tmem98</i>   | transmembrane protein 98                                                                | -2.096 | -1.467 | 0.70 |
| <i>fstl1</i>    | follistatin-like 1                                                                      | -2.146 | -1.503 | 0.70 |
| <i>nexn</i>     | nexilin (F actin binding protein)                                                       | -6.872 | -4.824 | 0.70 |
| <i>cpe</i>      | carboxypeptidase E                                                                      | -4.147 | -2.922 | 0.70 |
| RGD1559896      | chromosome 1 open reading frame 198                                                     | -2.995 | -2.111 | 0.70 |
| <i>pon3</i>     | paraoxonase 3                                                                           | -2.074 | -1.462 | 0.70 |
| <i>rin2</i>     | Ras and Rab interactor 2                                                                | -2.413 | -1.701 | 0.70 |
| <i>emp2</i>     | epithelial membrane protein 2                                                           | -2.110 | -1.488 | 0.71 |
| <i>vcl</i>      | vinculin                                                                                | -2.635 | -1.859 | 0.71 |
| <i>synj2</i>    | synaptojanin 2                                                                          | -2.337 | -1.649 | 0.71 |
| <i>anxa1</i>    | annexin A1                                                                              | -2.139 | -1.514 | 0.71 |
| <i>zfp36l2</i>  | ZFP36 ring finger protein-like 2                                                        | -2.511 | -1.778 | 0.71 |
| <i>pdlim1</i>   | PDZ and LIM domain 1                                                                    | -2.507 | -1.776 | 0.71 |
| <i>celf2</i>    | CUGBP, Elav-like family member 2                                                        | -3.195 | -2.264 | 0.71 |
| <i>ankrd44</i>  | ankyrin repeat domain 44                                                                | -2.014 | -1.430 | 0.71 |
| <i>apbb1</i>    | amyloid beta (A4) precursor protein-binding, family B, member 1 (Fe65)                  | -2.063 | -1.465 | 0.71 |
| <i>nacad</i>    | NAC alpha domain containing                                                             | -3.534 | -2.511 | 0.71 |
| <i>gnai1</i>    | guanine nucleotide binding protein (G protein), alpha inhibiting activity polypeptide 1 | -2.180 | -1.549 | 0.71 |
| <i>myadm</i>    | myeloid-associated differentiation marker                                               | -2.974 | -2.122 | 0.71 |
| <i>alcam</i>    | activated leukocyte cell adhesion molecule                                              | -2.833 | -2.030 | 0.72 |
| <i>ndrg2</i>    | NDRG family member 2                                                                    | -2.172 | -1.557 | 0.72 |
| <i>pycard</i>   | PYD and CARD domain containing                                                          | -2.019 | -1.450 | 0.72 |
| <i>ptpla</i>    | protein tyrosine phosphatase-like (proline instead of catalytic arginine), member A     | -3.638 | -2.616 | 0.72 |
| <i>myo1c</i>    | myosin IC                                                                               | -2.994 | -2.156 | 0.72 |
| <i>c1qtnf7</i>  | C1q and tumor necrosis factor related protein 7                                         | -4.259 | -3.070 | 0.72 |
| <i>tdrp</i>     | testis development related protein                                                      | -2.006 | -1.446 | 0.72 |
| <i>ndrg4</i>    | NDRG family member 4                                                                    | -2.021 | -1.457 | 0.72 |
| <i>rasgrp3</i>  | RAS guanyl releasing protein 3 (calcium and DAG-regulated)                              | -6.037 | -4.354 | 0.72 |
| LOC100910189    | uncharacterized LOC100910189                                                            | -2.753 | -1.987 | 0.72 |
| <i>rippy1</i>   | rippy1 homolog (zebrafish)                                                              | -2.836 | -2.048 | 0.72 |
| LOC100361913    | RIKEN cDNA 2200002D01 gene                                                              | -2.562 | -1.852 | 0.72 |
| <i>cldn2</i>    | claudin 2                                                                               | -5.555 | -4.027 | 0.72 |
| Phf17           | jade family PHD finger 1                                                                | -2.224 | -1.608 | 0.72 |
| LOC100912219    | uncharacterized LOC100912219                                                            | -2.603 | -1.888 | 0.73 |
| <i>tmem106a</i> | transmembrane protein 106A                                                              | -2.283 | -1.659 | 0.73 |
| <i>stard13</i>  | StAR-related lipid transfer (START) domain containing 13                                | -8.422 | -6.124 | 0.73 |
| <i>slc12a2</i>  | solute carrier family 12 (sodium/potassium/chloride transporter), member 2              | -2.360 | -1.717 | 0.73 |
| <i>hectd2</i>   | HECT domain containing E3 ubiquitin protein ligase 2                                    | -2.590 | -1.885 | 0.73 |
| <i>nipal2</i>   | NIPA-like domain containing 2                                                           | -2.049 | -1.493 | 0.73 |
| <i>stx3</i>     | syntaxin 3                                                                              | -2.703 | -1.972 | 0.73 |
| <i>lima1</i>    | LIM domain and actin binding 1                                                          | -2.535 | -1.850 | 0.73 |
| <i>fez2</i>     | fasciculation and elongation protein zeta 2 (zygin II)                                  | -2.021 | -1.477 | 0.73 |
| <i>dzip1l</i>   | DAZ interacting zinc finger protein 1-like                                              | -2.296 | -1.678 | 0.73 |
| <i>zc2hc1a</i>  | zinc finger, C2HC-type containing 1A                                                    | -2.995 | -2.190 | 0.73 |
| <i>zfp445</i>   | zinc finger protein 445                                                                 | -2.007 | -1.468 | 0.73 |
| <i>prnp</i>     | prion protein                                                                           | -2.253 | -1.653 | 0.73 |
| <i>cnst</i>     | consortin, connexin sorting protein                                                     | -2.590 | -1.904 | 0.74 |
| <i>col8a1</i>   | collagen, type VIII, alpha 1                                                            | -2.338 | -1.719 | 0.74 |
| <i>sun2</i>     | Sad1 and UNC84 domain containing 2                                                      | -2.192 | -1.616 | 0.74 |
| <i>thbd</i>     | thrombomodulin                                                                          | -2.925 | -2.162 | 0.74 |
| <i>plcd1</i>    | phospholipase C, delta 1                                                                | -2.037 | -1.521 | 0.75 |
| <i>itgb3</i>    | integrin, beta 3 (platelet glycoprotein IIIa, antigen CD61)                             | -2.390 | -1.785 | 0.75 |

|                   |                                                                                        |        |        |      |
|-------------------|----------------------------------------------------------------------------------------|--------|--------|------|
| <i>rnd3</i>       | Rho family GTPase 3                                                                    | -2.351 | -1.759 | 0.75 |
| <i>chn1</i>       | chimerin 1                                                                             | -2.507 | -1.879 | 0.75 |
| <i>gypc</i>       | glycophorin C (Gerbich blood group)                                                    | -2.492 | -1.873 | 0.75 |
| <i>pkia</i>       | protein kinase (cAMP-dependent, catalytic) inhibitor alpha                             | -3.027 | -2.279 | 0.75 |
| <i>gnb4</i>       | guanine nucleotide binding protein (G protein), beta polypeptide 4                     | -2.356 | -1.775 | 0.75 |
| <i>basp1</i>      | brain abundant, membrane attached signal protein 1                                     | -2.068 | -1.560 | 0.75 |
| <i>myl4</i>       | myosin, light chain 4, alkali; atrial, embryonic                                       | -2.056 | -1.560 | 0.76 |
| <i>zyx</i>        | zyxin                                                                                  | -2.309 | -1.756 | 0.76 |
| LOC100362894      | hypothetical protein LOC100362894                                                      | -2.465 | -1.878 | 0.76 |
| <i>anxa3</i>      | annexin A3                                                                             | -3.018 | -2.300 | 0.76 |
| <i>ahnak</i>      | AHNAK nucleoprotein                                                                    | -2.083 | -1.590 | 0.76 |
| <i>fxyd6</i>      | FXD domain containing ion transport regulator 6                                        | -2.091 | -1.601 | 0.77 |
| <i>atp10a</i>     | ATPase, class V, type 10A                                                              | -2.298 | -1.761 | 0.77 |
| <i>nap13</i>      | nucleosome assembly protein 1-like 3                                                   | -2.049 | -1.572 | 0.77 |
| <i>csgalnact2</i> | chondroitin sulfate N-acetylgalactosaminyltransferase 2                                | -2.333 | -1.794 | 0.77 |
| <i>farp1</i>      | FERM, RhoGEF (ARHGEF) and pleckstrin domain protein 1 (chondrocyte-derived)            | -2.046 | -1.576 | 0.77 |
| LOC100910396      | uncharacterized LOC100910396                                                           | -2.162 | -1.669 | 0.77 |
| <i>pls3</i>       | plastin 3                                                                              | -2.134 | -1.652 | 0.77 |
| <i>map1b</i>      | microtubule-associated protein 1B                                                      | -2.042 | -1.584 | 0.78 |
| <i>acta2</i>      | actin, alpha 2, smooth muscle, aorta                                                   | -3.181 | -2.473 | 0.78 |
| <i>slc38a4</i>    | solute carrier family 38, member 4                                                     | -3.148 | -2.456 | 0.78 |
| <i>hip1</i>       | huntingtin interacting protein 1                                                       | -2.723 | -2.126 | 0.78 |
| <i>tes</i>        | testis derived transcript (3 LIM domains)                                              | -2.498 | -1.961 | 0.79 |
| <i>vldlr</i>      | very low density lipoprotein receptor                                                  | -2.231 | -1.752 | 0.79 |
| <i>cr1l</i>       | complement component (3b/4b) receptor 1-like                                           | -2.021 | -1.589 | 0.79 |
| <i>rabgap1l</i>   | RAB GTPase activating protein 1-like                                                   | -2.150 | -1.691 | 0.79 |
| <i>clic4</i>      | chloride intracellular channel 4                                                       | -2.310 | -1.817 | 0.79 |
| <i>edn1</i>       | endothelin 1                                                                           | -6.288 | -4.948 | 0.79 |
| <i>pxdc1</i>      | PX domain containing 1                                                                 | -2.425 | -1.914 | 0.79 |
| <i>kank2</i>      | KN motif and ankyrin repeat domains 2                                                  | -2.078 | -1.643 | 0.79 |
| <i>fgf13</i>      | fibroblast growth factor 13                                                            | -2.085 | -1.650 | 0.79 |
| <i>rras2</i>      | related RAS viral (r-ras) oncogene homolog 2                                           | -2.138 | -1.692 | 0.79 |
| <i>nek6</i>       | NIMA-related kinase 6                                                                  | -2.236 | -1.770 | 0.79 |
| <i>myh9</i>       | myosin, heavy chain 9, non-muscle                                                      | -2.218 | -1.756 | 0.79 |
| <i>ptger2</i>     | prostaglandin E receptor 2 (subtype EP2), 53kDa                                        | -3.654 | -2.900 | 0.79 |
| LOC500300         | chromosome 10 open reading frame 10                                                    | -3.555 | -2.823 | 0.79 |
| <i>ankh</i>       | ANKH inorganic pyrophosphate transport regulator                                       | -2.002 | -1.594 | 0.80 |
| <i>dpysl3</i>     | dihydropyrimidinase-like 3                                                             | -4.249 | -3.396 | 0.80 |
| <i>ldb3</i>       | LIM domain binding 3                                                                   | -2.583 | -2.067 | 0.80 |
| <i>sema3a</i>     | sema domain, immunoglobulin domain (Ig), short basic domain, secreted, (semaphorin) 3A | -2.144 | -1.717 | 0.80 |
| <i>rrad</i>       | Ras-related associated with diabetes                                                   | -2.250 | -1.802 | 0.80 |
| <i>atf3</i>       | activating transcription factor 3                                                      | -2.141 | -1.717 | 0.80 |
| <i>irs2</i>       | insulin receptor substrate 2                                                           | -2.415 | -1.938 | 0.80 |
| <i>tmem51</i>     | transmembrane protein 51                                                               | -2.008 | -1.613 | 0.80 |
| <i>ankrd1</i>     | ankyrin repeat domain 1 (cardiac muscle)                                               | -4.748 | -3.827 | 0.81 |
| LOC100362819      | autism susceptibility candidate 2                                                      | -2.380 | -1.920 | 0.81 |
| <i>chmp4c</i>     | charged multivesicular body protein 4C                                                 | -2.405 | -1.942 | 0.81 |
| <i>rnd1</i>       | Rho family GTPase 1                                                                    | -2.513 | -2.031 | 0.81 |
| <i>gata3</i>      | GATA binding protein 3                                                                 | -3.144 | -2.543 | 0.81 |
| <i>pdgfc</i>      | platelet derived growth factor C                                                       | -2.267 | -1.838 | 0.81 |
| <i>pdlim7</i>     | PDZ and LIM domain 7 (enigma)                                                          | -2.210 | -1.796 | 0.81 |
| <i>mef2c</i>      | myocyte enhancer factor 2C                                                             | -3.346 | -2.728 | 0.82 |
| <i>gpnmb</i>      | glycoprotein (transmembrane) nmb                                                       | -2.083 | -1.699 | 0.82 |
| <i>gpr176</i>     | G protein-coupled receptor 176                                                         | -2.250 | -1.841 | 0.82 |
| <i>spry1</i>      | sprouty homolog 1, antagonist of FGF signaling (Drosophila)                            | -2.366 | -1.941 | 0.82 |
| MGC95152          | similar to B230212L03Rik protein                                                       | -2.180 | -1.779 | 0.82 |

|                   |                                                                      |        |        |      |
|-------------------|----------------------------------------------------------------------|--------|--------|------|
| <i>actn4</i>      | actinin, alpha 4                                                     | -2.472 | -2.040 | 0.83 |
| <i>actg2</i>      | actin, gamma 2, smooth muscle, enteric                               | -2.757 | -2.291 | 0.83 |
| <i>sertad4</i>    | SERTA domain containing 4                                            | -2.545 | -2.116 | 0.83 |
| <i>rasa1</i>      | RAS p21 protein activator (GTPase activating protein) 1              | -2.072 | -1.728 | 0.83 |
| <i>s1pr1</i>      | sphingosine-1-phosphate receptor 1                                   | -8.059 | -6.742 | 0.84 |
| <i>plcx2</i>      | phosphatidylinositol-specific phospholipase C, X domain containing 2 | -2.179 | -1.840 | 0.84 |
| <i>scn9a</i>      | sodium channel, voltage-gated, type IX, alpha subunit                | -4.290 | -3.628 | 0.85 |
| <i>f2r</i>        | coagulation factor II (thrombin) receptor                            | -2.096 | -1.773 | 0.85 |
| <i>slc40a1</i>    | solute carrier family 40 (iron-regulated transporter), member 1      | -2.037 | -1.724 | 0.85 |
| <i>lxn</i>        | latexin                                                              | -2.436 | -2.067 | 0.85 |
| <i>lphn3</i>      | latrophilin 3                                                        | -2.606 | -2.213 | 0.85 |
| <i>tead3</i>      | TEA domain family member 3                                           | -2.056 | -1.749 | 0.85 |
| <i>lpar4</i>      | lysophosphatidic acid receptor 4                                     | -3.060 | -2.612 | 0.85 |
| <i>trpc4</i>      | transient receptor potential cation channel, subfamily C, member 4   | -2.029 | -1.732 | 0.85 |
| <i>arid5b</i>     | AT rich interactive domain 5B (MRF1-like)                            | -3.669 | -3.157 | 0.86 |
| <i>map3k8</i>     | mitogen-activated protein kinase kinase kinase 8                     | -2.002 | -1.731 | 0.86 |
| <i>camta1</i>     | calmodulin binding transcription activator 1                         | -2.572 | -2.247 | 0.87 |
| <i>kctd9</i>      | potassium channel tetramerization domain containing 9                | -2.068 | -1.810 | 0.88 |
| <i>sbspon</i>     | somatomedin B and thrombospondin, type 1 domain containing           | -2.893 | -2.540 | 0.88 |
| <i>pla2r1</i>     | phospholipase A2 receptor 1, 180kDa                                  | -2.085 | -1.834 | 0.88 |
| <i>bbs7</i>       | Bardet-Biedl syndrome 7                                              | -2.022 | -1.789 | 0.88 |
| <i>plcx3</i>      | phosphatidylinositol-specific phospholipase C, X domain containing 3 | -2.061 | -1.825 | 0.89 |
| <i>cnksr3</i>     | CNKSR family member 3                                                | -3.084 | -2.733 | 0.89 |
| <i>rassf3</i>     | Ras association (RalGDS/AF-6) domain family member 3                 | -2.112 | -1.885 | 0.89 |
| <i>pcgf5</i>      | polycomb group ring finger 5                                         | -2.781 | -2.487 | 0.89 |
| <i>scrn1</i>      | secernin 1                                                           | -2.120 | -1.897 | 0.89 |
| <i>cryab</i>      | crystallin, alpha B                                                  | -2.500 | -2.242 | 0.90 |
| <i>car5b</i>      | carbonic anhydrase VB, mitochondrial                                 | -2.050 | -1.843 | 0.90 |
| <i>rock2</i>      | Rho-associated, coiled-coil containing protein kinase 2              | -2.227 | -2.009 | 0.90 |
| <i>utrn</i>       | utrophin                                                             | -2.037 | -1.861 | 0.91 |
| <i>scn7a</i>      | sodium channel, voltage-gated, type VII, alpha subunit               | -2.503 | -2.289 | 0.91 |
| <i>acta1</i>      | actin, alpha 1, skeletal muscle                                      | -5.001 | -4.596 | 0.92 |
| <i>myl9</i>       | myosin, light chain 9, regulatory                                    | -2.159 | -1.987 | 0.92 |
| <i>lrch1</i>      | leucine-rich repeats and calponin homology (CH) domain containing 1  | -3.168 | -2.938 | 0.93 |
| <i>adamts12</i>   | ADAM metalloproteinase with thrombospondin type 1 motif, 12          | -3.278 | -3.084 | 0.94 |
| <i>glipr1</i>     | GLI pathogenesis-related 1                                           | -2.012 | -1.921 | 0.95 |
| <i>vtcn1</i>      | V-set domain containing T cell activation inhibitor 1                | -2.387 | -2.309 | 0.97 |
| <i>f3</i>         | coagulation factor III (thromboplastin, tissue factor)               | -3.560 | -3.476 | 0.98 |
| <i>abcd2</i>      | ATP-binding cassette, sub-family D (ALD), member 2                   | -2.139 | -2.100 | 0.98 |
| <i>klf7</i>       | Kruppel-like factor 7 (ubiquitous)                                   | -2.234 | -2.257 | 1.01 |
| <i>tnnc1</i>      | troponin C type 1 (slow)                                             | -3.005 | -3.063 | 1.02 |
| <i>testin</i>     | RIKEN cDNA 4930486L24 gene                                           | -2.778 | -2.875 | 1.03 |
| <i>Ghr</i>        | Growth Hormone receptor                                              | -1.932 | -2.067 | 1.07 |
| <i>trpc3</i>      | transient receptor potential cation channel, subfamily C, member 3   | -2.473 | -2.656 | 1.07 |
| <i>Cnn1</i>       | Calponin 1                                                           | -1.920 | -2.089 | 1.09 |
| <i>tjp2</i>       | tight junction protein 2                                             | -2.054 | -2.268 | 1.10 |
| <i>tpm2</i>       | tropomyosin 2, beta                                                  | -2.321 | -2.673 | 1.15 |
| <i>Hipk3</i>      | Homeodomain Interacting Protein Kinase 3                             | -1.864 | -2.221 | 1.19 |
| <i>Arg1</i>       | Arginase 1                                                           | -1.881 | -2.285 | 1.21 |
| <i>Gadd45g</i>    | Growth Arrest and DNA-Damage Inducible                               | -1.567 | -2.039 | 1.30 |
| <i>tns3</i>       | tensin 3                                                             | -2.035 | -2.700 | 1.33 |
| <i>lrrc39</i>     | leucine rich repeat containing 39                                    | -3.304 | -4.767 | 1.44 |
| <i>Fam198b</i>    | family with sequence similarity 198, member B                        | -1.396 | -2.341 | 1.68 |
| <i>RGD1305254</i> | cell migration inducing protein, hyaluronan binding                  | -2.127 | -3.616 | 1.70 |

**Supplementary Table S2** Major functional categories and the associated genes identified by DAVID

analysis of transcripts regulated to a similar extent by FSH stimulation or PKA activation

| <b>Functional Categories</b>          | <b>Gene Symbol</b>                                                                                                                                                                                                                                                                                                             |
|---------------------------------------|--------------------------------------------------------------------------------------------------------------------------------------------------------------------------------------------------------------------------------------------------------------------------------------------------------------------------------|
| Cholesterol biosynthesis              | CYP51, EBP, MVD, DHCR7, HMGCS1, MVK, CFTR, LSS, IDI1, HSD17B7, FDFT1                                                                                                                                                                                                                                                           |
| Steroid biosynthesis                  | CYP51, EBP, MVD, HSD17B1, DHCR7, HMGCS1, MVK, LSS, IDI1, HSD17B7, FDFT1                                                                                                                                                                                                                                                        |
| Actin cytoskeleton                    | MICALL2, LIMA1, ACTA1, PDLIM7, ACTN4, CRYAB, ACTN1, ZYX, MYH9, FLNB, VCL, CDC42EP2, TPM1, RASA1                                                                                                                                                                                                                                |
| Apoptosis                             | MEF2C, GCLC, MITF, FOXO1, CX3CL1, TIMP3, GCH1, EDNRB, ALDH1A3, PYCARD, PCSK9, NQO1, DDAH1, RASA1, IHH, GHR, HIP1, EGFR, BMP4, KCNMA1, PGAP2, HERPUD1, SGK1, CEBPB, ACTN4, MADD, CRYAB, MSH2, SPHK1, ANXA1, ITGA1, CST3, NR4A1, INHA, GAL, SOD2, INHBA, PLA2G4A, NOTCH1, NUPR1, F3, HIPK3, HSPB1, HSPD1, PERP, PRNP, APBB1, F2R |
| Regulation of Transcription           | MEF2C, THRB, MITF, FOXO1, NPAS2, S1PR1, GATA3, GATA4, RUNX1, DDAH1, IHH, NR1H3, BMP4, SREBF1, KLF6, KLF7, BMP2, CEBPB, CEBPD, PCBD1, MAFB, NR4A1, SIX4, TEAD3, INHBA, NOTCH1, ZFPM2, NR5A2, APBB1, F2R, NR5A1                                                                                                                  |
| Protein kinases                       | EGFR, IRAK2, SGK1, ROCK2, MAPKAPK3, EPHB3, IRS1, PRKCB, RPS6KA5, HUNK, PLK2, SBK1, HIPK3, MAP3K8, RELN, DYRK3, GRK5, NEK6, DCLK1, AKT3                                                                                                                                                                                         |
| Chromatin organization,               | HDAC5, RPS6KA5, PHF17, HOPX, NAP1L3, APBB1                                                                                                                                                                                                                                                                                     |
| G1/S transition of mitotic cell cycle | CCND2, ID4, EGFR, INHBA,                                                                                                                                                                                                                                                                                                       |

**Supplementary Table S3.** Major functional categories and the associated genes identified by DAVID analysis of transcripts that are regulated more effectively by FSH stimulation than PKA-CQR expression.

| <b>Functional Categories</b> | <b>Gene Symbol</b>                                                  |
|------------------------------|---------------------------------------------------------------------|
| Ion Homeostasis              | AGTR2, CAV1, PTGER3, CCL2, ADM, AGTR1A, RYR2, LPAR1                 |
| Extracellular matrix binding | NID1, DCN, SPP1, CYR61                                              |
| Apoptosis                    | AGTR2, BDNF, CCL2, HTRA2, ETS1, ARNT2, CLU, CIDEA, CD74, TGFB2, FN1 |
| Cytoskeleton Organization    | CAV1, SORBS1, CALD1, PDLIM3, GAS7                                   |
| Regulation of Transcription  | NFE2, MEOX2, ETS1, ARNT2, LRRFIP1, PAWR, NR0B1                      |

**Supplementary Table S4.** Major functional categories and the associated genes identified by DAVID analysis of transcripts that are regulated more effectively by PKA-CQR expression than by by FSH stimulation.

| <b>Functional Categories</b> | <b>Gene Symbol</b>                      |
|------------------------------|-----------------------------------------|
| Ovulation                    | AREG, EREG, PGR, SNAP25, TNFAIP6, PTGS2 |
| Transition metal Binding     | NR4A3, PGR, CYP19A1, PTGS2, SCD         |
| Integral to membrane         | AREG, GJA5, HAVCR1, NPY1R, SLC7a11, SCD |

**Supplementary table S5: List of antibodies and conditions used for immunoblotting.**

| ANTIBODY                                        | Supplier P/N                      | BLOCK & Conditions          | 1° ANTIBODY Dilution & Conditions                        | Post 1° WASHES              | 2° ANTIBODY Dilution & Conditions                                           | Post 2° WASHES                                                                                                         |
|-------------------------------------------------|-----------------------------------|-----------------------------|----------------------------------------------------------|-----------------------------|-----------------------------------------------------------------------------|------------------------------------------------------------------------------------------------------------------------|
| <b>Akt (PKB)</b>                                | Cell Signaling #9272              | 0.5% Block/TBST<br>1-2hr RT | 1:1000 in 5% BSA/TBST<br>O/N 4°C                         | TBST 3x 5min                | SIGMA <b>Anti-Rabbit</b> IgG-POD<br>1:10,000 in 0.5% Block/TBST<br>1.5hr RT | TBST 3x 5min                                                                                                           |
| <b>P-Akt (Ser473)</b>                           | Cell Signaling #9271              | 0.5% Block/TBST<br>1-2hr RT | 1:500 in 5% BSA/TBST<br>O/N 4°C                          | TBST 3x 5min                | SIGMA <b>Anti-Rabbit</b> IgG-POD<br>1:10,000 in 0.5% Block/TBST<br>1.5hr RT | TBST 3x 5min                                                                                                           |
| <b>P-Akt (Thr308)</b>                           | Cell Signaling #9275              | 5% Milk/TBS<br>1-2hr RT     | 1:500 in 5% Milk/TBST + 0.1% Tween + azi<br>TBS 3x 10min |                             | <b>Anti-Rabbit</b> IgG-POD<br>1:500 in 5% Milk/TBS                          | TBS 3x 10min                                                                                                           |
| <b>β-Catenin</b>                                | Santa Cruz #7199                  | 3% BSA/TBST<br>1-2hr RT     | 1:1000 in 3% BSA/TBST<br>O/N 4°C                         | TBST 3x 5min                | SIGMA <b>Anti-Rabbit</b> IgG-POD<br>1:10,000 in 3% BSA/TBST<br>1.5hr RT     | TBST 3x 5min                                                                                                           |
| <b>P-β-Catenin (Ser552)</b>                     | Cell Signaling #9566              | 3% BSA/TBST<br>1-2hr RT     | 1:1000 in 3% BSA/TBST<br>O/N 4°C                         | TBST 3x 5min                | SIGMA <b>Anti-Rabbit</b> IgG-POD<br>1:10,000 in 3% BSA/TBST<br>1.5hr RT     | TBST 3x 5min                                                                                                           |
| <b>CREB</b>                                     | Millipore #06-863                 | 3% Milk/PBS<br>1-2hr RT     | 1:1000 in 3% Milk/PBS<br>O/N 4°C                         | MQ-H <sub>2</sub> O 2x 5min | SIGMA <b>Anti-Rabbit</b> IgG-POD<br>1:10,000 in 3% Milk/PBS<br>1.5hr RT     | MQ-H <sub>2</sub> O 2x 5min<br>0.05% Tween/PBS 1x 5min                                                                 |
| <b>P-CREB (Ser133)</b>                          | Millipore #05-667                 | 3% Milk/TBS<br>1-2hr RT     | 1:100 in 3% Milk/TBS<br>O/N 4°C                          | MQ-H <sub>2</sub> O 2x 5min | SIGMA <b>Anti-Mouse</b> IgG-POD<br>1:10,000 in 3% Milk/TBS<br>1.5hr RT      | MQ-H <sub>2</sub> O 5x Rinse<br>MQ-H <sub>2</sub> O 2x 5min<br>0.05% Tween/TBS 1x 5min<br>MQ-H <sub>2</sub> O 5x Rinse |
| <b>FoxO1</b>                                    | Cell Signaling #2880              | 5% Milk/TBST<br>1-2hr RT    | 1:2000 in 5% BSA/TBST<br>O/N 4°C                         | TBST 3x 5min                | SIGMA <b>Anti-Rabbit</b> IgG-POD<br>1:10,000 in 5% Milk/TBST<br>1.5hr RT    | TBST 3x 5min                                                                                                           |
| <b>P-FoxO1 (Ser256)</b>                         | Santa Cruz #sc101681              | 0.5% Block/TBST<br>1-2hr RT | 1:100 in 5% BSA/TBST<br>O/N 4°C                          | TBST 3x 5min                | SIGMA <b>Anti-Rabbit</b> IgG-POD<br>1:10,000 in 0.5% Block/TBST<br>1.5hr RT | TBST 3x 5min                                                                                                           |
| <b>GAB2</b>                                     | EMD Millipore #06-967             | 5% Milk/TBS<br>1-2 hr RT    | 1:1000 in 5% Milk/TBS + azide                            | TBS 3x 10min                | <b>Anti-Rabbit</b> IgG-POD<br>1:1500 in 5% Milk/TBS                         | TBS 3x 10min                                                                                                           |
| <b>P-GAB2 (Ser159)</b>                          | Cell Signaling #3884              | 5% Milk/TBS<br>1-2 hr RT    | 1:1000 in 5% Milk/TBS + azide                            | TBS 3x 10min                | <b>Anti-Rabbit</b> IgG-POD<br>1:1000 in 5% Milk/TBS                         | TBS 3x 10min                                                                                                           |
| <b>GSK-3β</b>                                   | Cell Signaling #9315              | 5% Milk/TBS<br>1-2 hr RT    | 1:1000 in 5% Milk/TBS + azide                            | TBS 3x 10min                | <b>Anti-Rabbit</b> IgG-POD<br>1:1000 in 5% Milk/TBS                         | TBS 3x 10min                                                                                                           |
| <b>P-GSK-3β (Ser9)</b>                          | Cell Signaling #9336              | 5% Milk/TBS<br>1-2 hr RT    | 1:1000 in 5% Milk/TBS + azide                            | TBS 3x 10min                | <b>Anti-Rabbit</b> IgG-POD<br>1:1000 in 5% Milk/TBS                         | TBS 3x 10min                                                                                                           |
| <b>P-p38 (Thr180/Tyr182) (MAPK)</b>             | Cell Signaling #4511<br>(Rab mAb) | 5% Milk/TBST<br>1-2hr RT    | 1:1000 in 5% BSA/TBST<br>O/N 4°C                         | TBST 3x 5min                | SIGMA <b>Anti-Rabbit</b> IgG-POD<br>1:10,000 in 5% Milk/TBST<br>1.5hr RT    | TBST 3x 5min                                                                                                           |
| <b>p42/44 (ERK 1&amp;2)</b>                     | Millipore #06-182                 | 3% Milk/PBS<br>1-2hr RT     | 1:10,000 in 3% Milk/PBS<br>O/N 4°C                       | MQ-H <sub>2</sub> O 2x 5min | SIGMA <b>Anti-Rabbit</b> IgG-POD<br>1:10,000 in 3% Milk/PBS<br>1.5hr RT     | MQ-H <sub>2</sub> O 2x 5min<br>0.05% Tween/PBS 1x 5min<br>MQ-H <sub>2</sub> O 5x Rinse                                 |
| <b>P-p42/44 (Thr202/Tyr204) (P-ERK 1&amp;2)</b> | Cell Signaling #9109              | 0.5% Block/TBST<br>1-2hr RT | 1:2000 in 5% BSA/TBST<br>O/N 4°C                         | TBST 3x 5min                | SIGMA <b>Anti-Rabbit</b> IgG-POD<br>1:10,000 in 0.5% Block/TBST<br>1.5hr RT | TBST 3x 5min                                                                                                           |
| <b>PKAc</b>                                     | Transduction Labs #610981<br>(BD) | 0.5% Block/TBS<br>1-2hr RT  | 1:500 in 0.5% Block/TBS<br>O/N 4°C                       | TBST 3x 5min                | SIGMA <b>Anti-Mouse</b> IgG-POD<br>1:10,000 in 0.5% Block/TBS<br>1.5hr RT   | TBST 3x 5min                                                                                                           |
| <b>cSrc</b>                                     | Santa Cruz #sc18                  | 3% Milk/TBST<br>1-2hr RT    | 1:1000 in 3% Milk/TBST<br>O/N 4°C                        | TBST 3x 5min                | SIGMA <b>Anti-Rabbit</b> IgG-POD<br>1:10,000 in 3% Milk/TBST<br>1.5hr RT    | TBST 3x 5min                                                                                                           |
| <b>P-Src (Tyr416)</b>                           | Cell Signaling #6943              | 5% Milk/TBST<br>1-2hr RT    | 1:1000 in 5% BSA/TBST<br>O/N 4°C                         | TBST 3x 5min                | SIGMA <b>Anti-Rabbit</b> IgG-POD<br>1:10,000 in 5% Milk/TBST<br>1.5hr RT    | TBST 3x 5min                                                                                                           |
| <b>YAP</b>                                      | Cell Signaling #12395             | 3% BSA/TBST<br>1-2hr RT     | 1:1000 in 3% BSA/TBST<br>O/N 4°C                         | TBST 3x 5min                | SIGMA <b>Anti-Mouse</b> IgG-POD<br>1:10,000 in 3% BSA/TBST<br>1.5hr RT      | TBST 3x 5min                                                                                                           |
| <b>P-YAP (Ser127)</b>                           | Cell Signaling #13008             | 3% BSA/TBST<br>1-2hr RT     | 1:1000 in 3% BSA/TBST<br>O/N 4°C                         | TBST 3x 5min                | SIGMA <b>Anti-Rabbit</b> IgG-POD<br>1:10,000 in 3% BSA/TBST<br>1.5hr RT     | TBST 3x 5min                                                                                                           |
